1 ELECTRO-STERIC MECHANISM OF CLC-2 CHLORIDE CHANNEL ACTIVATION

2

3

4 José J. De Jesús-Pérez<sup>1</sup>, G. Arlette Méndez-Maldonado<sup>2</sup>, Irma L. Gonzalez-Hernandez<sup>2</sup>, Victor De  
5 la Rosa<sup>3</sup>, Roberto Gastélum-Garibaldi<sup>2</sup>, Jorge E. Sánchez-Rodríguez<sup>2</sup>, and Jorge Arreola<sup>1,\*</sup>

6

7

8 <sup>1</sup>Physics Institute, Universidad Autónoma de San Luis Potosí, Ave. Dr. Manuel Nava #6, San Luis  
9 Potosí, SLP 78290, México.

10 <sup>2</sup> Departamento de Física, Centro Universitario de Ciencias Exactas e Ingenierías, Universidad de  
11 Guadalajara. Blvd. M. García Barragán #1421, Guadalajara, Jal 44430, México.

12 <sup>3</sup>Cátedra CONACYT, School of Medicine of Universidad Autónoma de San Luis Potosí. Ave. V.  
13 Carranza 2005, Los Filtros San Luis Potosí, SLP 78290, SLP, México.

14

15

16 Running Title: Mechanism of CLC-2 gating

17

18

19 Corresponding Author:

20

21 \*Dr. Jorge Arreola

22 Instituto de Física, Universidad Autónoma de San Luis Potosí

23 Dr. Manuel Nava #6

24 San Luis Potosí, SLP 78290, México

25 Tel. (444) 826-2363 ext 136

26 Fax (444) 813-3874

27 Email: [arreola@dec1.ifisica.uaslp.mx](mailto:arreola@dec1.ifisica.uaslp.mx)

28

29

30 **ABSTRACT**

31 Two-pore voltage-gated CLC chloride channels control neuronal and muscle excitability. They  
32 share a dimeric structure but their activation mechanism remains unresolved. Here we  
33 determine the step-by-step activation mechanism of the broadly expressed CLC-2 channel using  
34 homology modelling, molecular dynamic simulations and functional studies. We establish that a  
35 two-leaf gate formed by Tyr561-H<sub>2</sub>O-Glu213 flanked by Lys568/Glu174 and Lys212 closes the  
36 canonical pore. Activation begins when a hyperpolarization-propelled intracellular chloride  
37 occupies the pore and splits Tyr561-H<sub>2</sub>O-Glu213 by electrostatic/steric repulsion. Unrestrained  
38 Glu213 rotates outwardly to bind Lys212 but the pore remains closed. Protonation breaks the  
39 Glu213-Lys212 interaction while another chloride occupies the pore thus catalysing chloride exit  
40 via Lys212. Also, we found that the canonical pore is uncoupled from a cytosolic cavity by a  
41 Tyr561-containing hydrophobic gate that prevents Glu213 protonation by intracellular protons.  
42 Our data provide atomistic details about CLC-2 activation but this mechanism might be common  
43 to other CLC channels.

44 **KEYWORDS:**

45

46 Ion channel gating, CLC chloride channel, CLC-2 gating, pore occupancy, H<sup>+</sup>, chloride.

47 **INTRODUCTION**

48 Gating is a fundamental property whereby membrane channels open a permeation pathway so  
49 ions can passively flow in or out of the cells, thus ensuing electric communication(Bezanilla,  
50 2008; Hille et al., 1999; Jiang et al., 2003; Long et al., 2005). In some channels, a sudden change  
51 in the membrane electrical field, ligand binding or lipid bilayer forces triggers a cascade of  
52 structural rearrangements that ultimately open the permeation pathway(Bezanilla, 2008, 2002;  
53 Cox et al., 2016; Goldschen-Ohm and Chanda, 2017; Hille et al., 1999; Jiang et al., 2003; Long et  
54 al., 2005). CLC chloride ( $\text{Cl}^-$ ) channels are voltage-activated or type III(Goldschen-Ohm and  
55 Chanda, 2017) channels despite lacking a canonical voltage sensor(Jentsch and Pusch, 2018),  
56 however, the molecular mechanism of voltage-dependent activation remains elusive.

57 The CLC protein family includes  $\text{Cl}^-$  channels (CLC-0, CLC-1, CLC-2, CLC-Ka, and CLC-Kb) and 2:1  
58  $\text{Cl}^-/\text{H}^+$  exchangers that are structurally conserved(Jentsch and Pusch, 2018). They share a double  
59 pore architecture, each pore is closed by a highly conserved Glu residue called  $\text{Glu}_{\text{gate}}$  that  
60 protrudes into the permeation pathway(Dutzler et al., 2003, 2002; Park et al., 2017; Park and  
61 MacKinnon, 2018). This structure of the pore suggested that voltage gating may occur  
62 unconventionally(Schewe et al., 2016).  $\text{Glu}_{\text{gate}}$  would be open by repulsion when voltage drives a  
63 permeant anion into the pore(Chen, 2003; De Jesús-Pérez et al., 2016; Pusch et al., 1995;  
64 Sánchez-Rodríguez et al., 2012, 2010) and/or by protonation when voltage drives a proton into  
65 the pore(Niemeyer et al., 2009a; Traverso et al., 2006a). Data collected varying the extracellular  
66 anion concentration or the anion mole fraction supported the idea that CLC-0 and CLC-1  
67 channels were gated by permeant anions repelling the  $\text{Glu}_{\text{gate}}$ (Chen, 2003; Pusch et al., 1995;

68 Rychkov et al., 1998, 1996). However, data collected under acidic cytosolic conditions led to an  
69 alternative gating mechanism in CLC-0. This alternative mechanism invokes voltage-dependent  
70 protonation of Glu<sub>gate</sub> by intracellular protons(Miller, 2006; Traverso et al., 2006a), a reaction  
71 catalysed by extracellular Cl<sup>-</sup> anions(Miller, 2006). Although this hypothesis may explain CLC-0  
72 and CLC-1 gating, the gating of CLC-2 diverges from this. CLC-2 activation depends on  
73 hyperpolarization and intracellular Cl<sup>-</sup> while depolarization causes deactivation(De Santiago et  
74 al., 2005; Sánchez-Rodríguez et al., 2010; Thiemann et al., 1992). Furthermore, anions unable to  
75 permeate the pore when applied from the intracellular side still support CLC-2 voltage gating(De  
76 Jesús-Pérez et al., 2016). Notable, intracellular acidification has little effect on gating. In  
77 contrast, extracellular acidification increases the apparent open probability(Niemeyer et al.,  
78 2009b) in a voltage-independent manner(Sánchez-Rodríguez et al., 2012) but CLC-2 is still  
79 activated under unfavourable protonation condition ( $[H^+]_e = 10^{-10}$  M)(De Jesús-Pérez et al.,  
80 2016). Thus, protonation cannot explain voltage-dependent activation. Instead, we proposed  
81 that hyperpolarization drives Cl<sup>-</sup> into the pore causing Glu<sub>gate</sub> to be open by electrostatic and  
82 steric repulsion(De Jesús-Pérez et al., 2016; Sánchez-Rodríguez et al., 2010) and then CLC-2  
83 Glu<sub>gate</sub> protonation stabilizes its open conformation(Sánchez-Rodríguez et al., 2012).

84 Establishing an activation mechanism for CLC Cl<sup>-</sup> channels has been hindered by limited  
85 structural information on these channels and the challenge that impose gathering information  
86 about a process that occurs in nanosecond time scale within a narrow pore. Here we combined  
87 quantitative functional analysis with molecular dynamics (MD) simulations to overcome these  
88 limitations and to establish the molecular mechanism of CLC-2 activation, a Cl<sup>-</sup> channel highly



89 expressed throughout the central nervous system that controls neuronal excitability and  
90 aldosterone secretion(Boccaccio et al., 2018; Jentsch and Pusch, 2018; Thiemann et al., 1992).

## 91 RESULTS

### 92 **A water-mediated Tyr561-Glu<sub>gate</sub> ionic interaction holds the CLC-2 pores closed.**

93 To study CLC-2 activation, CLC-2<sup>CLC-K</sup> and CLC-2<sup>CLC-1</sup> homology models of the CLC-2 structure  
94 were built using the CLC-K (5TQQ)(Park et al., 2017) and hCLC-1 (6COY)(Park and MacKinnon,  
95 2018) Cl<sup>-</sup> channel structures as templates. Both CLC-2<sup>CLC-K</sup> and CLC-2<sup>CLC-1</sup> are dimers with a  
96 transmembrane domain (TMD) comprising 17  $\alpha$ -helices termed B-R (Fig. 1A). Helix A (residues 1  
97 to 96), which is not in the template structures, next to the N-terminus could not be modelled.  
98 Only the CLC-2<sup>CLC-K</sup> structure included the C-terminus with two cystathionine- $\beta$ -synthase (CBS)  
99 domains. Both models show the classical rhombus shape of the CLC protein structures when  
100 viewed from the top. The root mean square deviation between TMD backbones of these models  
101 is 1.0 Å and becomes 3.0 Å after adding the C-terminus.

102

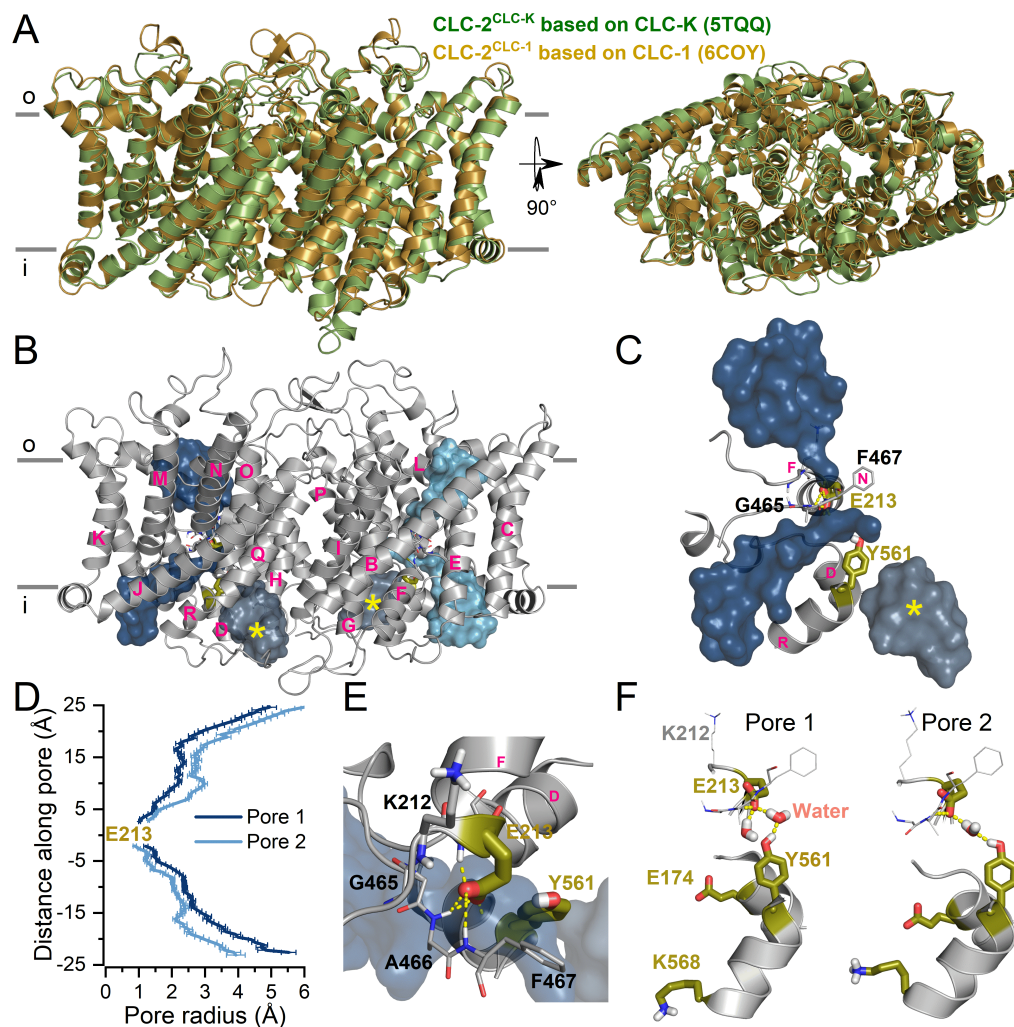

103

104 **Fig. 1 Homology models of the CLC-2 structure.**

105 A. Homodimeric models based on the cryo-EM structure of CLC-K (5TQQ, green) and hCLC-1  
 106 (6COY, orange) channels showing a view of the transmembrane domains from the  
 107 membrane plane (left) or the top (right). Parallel grey lines indicate external (o) and internal  
 108 (i) membrane limits. Both structures are similar (RMSD = 1.0 Å). For clarity, the intracellular  
 109 carboxyl tail containing the CBS domains was not included.

110 B. CLC-2 homology model based on the hCLC-1 structure after 30 ns of MD simulation. The  
 111 names of the transmembrane helices are shown in pink letters (B-R). The canonical pores

112 *flooded with water are represented as dark and light blue surfaces in each subunit. The*  
113 *intracellular alternative pathways are shown in grey marked with yellow asterisks.*

114 C. *The canonical pore (dark blue) and the intracellular alternative pathway (yellow asterisk)*  
115 *within one subunit of CLC-2. Water molecules filling these cavities represent the structure.*  
116 *Tyr561 and Glu213 ( $Glu_{gate}$ ) are shown in olive. Note that Tyr561 separates the canonical*  
117 *pore and the intracellular aqueous pathway.  $Glu_{gate}$  is located at the centre of the canonical*  
118 *pore where the water chain is interrupted.*

119 D. *Average pore radius along canonical pores. The radius was measured using*  
120 *CAVER(Chovancova et al., 2012) every 1 ns during 30 ns at 0 mV. Deep and light blue colours*  
121 *correspond to pores 1 and 2 shown in panel B.*

122 E. *Close-up showing stabilization of  $Glu_{gate}$  by interactions with residues  $_{465}GAF_{567}$  and Lys212*  
123 *(sticks).*

124 *The CLC-2 gate is formed by Tyr561-H<sub>2</sub>O- $Glu_{gate}$ . Hydrogen bonds (dashed yellow lines) link*  
125  *$Glu_{gate}$  to Tyr561 through one (right) or two (left) water molecules (ball and stick*  
126 *representation). Additionally, residues Lys568 and Glu174 on the intracellular side and Lys212 on*  
127 *the extracellular side are shown.*

128 To determine the radius and shape of the pore, CLC-2<sup>CLC-K</sup> and CLC-2<sup>CLC-1</sup> were embedded in  
129 DMPC and POPC bilayers, hydrated with 140 mM NaCl and equilibrated using the CHARMM-GUI  
130 protocol(Allouche, 2012) at 0 mV during 100 ns and 30 ns, respectively. The initial position of  
131  $Glu_{gate}$  in each model was different but reached the same position after equilibration  
132 (Supplementary Fig. 1). The canonical CLC-2 pore is formed by residues  $_{164}APQAVGSGIPEM_{175}$ ,

133  $_{209}\text{PLGKEG}_{214}$ ,  $_{458}\text{TTIPVPCGAFMP}_{469}$ , and  $_{561}\text{YDSIIRIK}_{568}$  located at the N-termini of  $\alpha\text{D}$ ,  $\alpha\text{F}$ ,  $\alpha\text{N}$ ,  
134 and  $\alpha\text{R}$  helices (Fig. 1B), respectively. Lys212 and Lys568 + Glu174 were located at the  
135 extracellular and intracellular entrances, respectively (Fig. 1E and 1F). Each monomer has a  
136 curvilinear permeation pathway filled with water and disrupted at the centre by Glu213 ( $\text{Glu}_{\text{gate}}$ )  
137 (Fig. 1C). At each end of these canonical pores, there is a large water cavity. A third water cavity  
138 resembling the bifurcated pathway of hCLC-1(Park and MacKinnon, 2018) was observed in the  
139 cytosolic side (Fig. 1C, yellow star). However, this cavity is uncoupled from the canonical pore by  
140 bulky Tyr561. The radius of the pore in each monomer is shown in Fig. 1B (dark and light blue);  
141 each pore is less than 0.5 Å at the side chain of  $\text{Glu}_{\text{gate}}$  (Fig. 1D). Thereafter, the radius increases  
142 to about 2.5 Å at  $\pm 15$  Å away from  $\text{Glu}_{\text{gate}}$  and even more at both pore entrances. At 0 mV, the  
143 charged carboxyl group of  $\text{Glu}_{\text{gate}}$  is stabilized by hydrogen bonds (H-bonds) with the amino  
144 groups of  $_{466}\text{AF}_{467}$  and  $_{212}\text{KEG}_{214}$  (Fig. 1E). Also,  $\text{Glu}_{\text{gate}}$  forms an ionic interaction with the –OH  
145 group of Tyr561 via H-bonds mediated by one  $\text{H}_2\text{O}$  molecule (Fig. 1F). This conformation is  
146 similar to that of  $\text{Glu}_{\text{gate}}$  in CmCLC and in rCLC-2 models built using the CmCLC structure(Feng et  
147 al., 2010; McKiernan et al., 2020). We propose that the Tyr561- $\text{H}_2\text{O}$ - $\text{Glu}_{\text{gate}}$  array forms the gate  
148 that maintains CLC-2 in the closed state.

#### 149 **Gating is a multistep process triggered by $\text{Cl}^-$ .**

150 To investigate the conformational changes that lead to CLC-2 opening we performed MD  
151 simulations using  $\text{CLC-2}^{\text{CLC-K}}$  and the three compartments/two-bilayer computational  
152 electrophysiology method (CompEI)(Kutzner et al., 2011). Each bilayer containing one channel  
153 was simultaneously exposed to the same voltage but opposite polarity during 480 ns ( $^+\text{CLC-2}^{\text{CLC-K}}$

154 in bilayer 1 to +94 and +940 mV and  $\text{CLC-2}^{\text{CLC-K}}$  in bilayer 2 to -94 and -940 mV). This protocol  
155 was followed by applying a uniform electric field (Crozier et al., 2001; Roux, 2008) of -500 mV  
156 perpendicular to bilayer 2 during 200 ns.

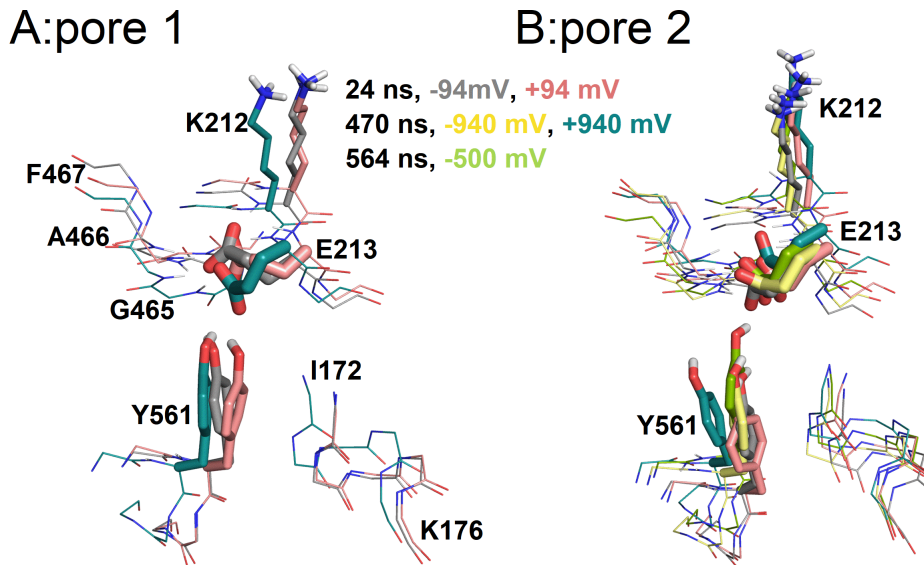

157  
158 **Fig. 2 Changes in the transmembrane voltage do not trigger gating when the pores are**  
159 **empty.**

160 *The conformation of three pores: pore 1 of  $^+\text{CLC-2}^{\text{CLC-K}}$  (A) and pore 2 of  $^-\text{CLC-2}^{\text{CLC-K}}$  and  $^+\text{CLC-2}^{\text{CLC-K}}$*   
161 *(B) channels are depicted at different voltages (-94, -940, 500, +94, and +940 mV) and MD*  
162 *simulation times (24, 470, and 564 ns). The spatial position of Tyr561, Glu<sub>gate</sub>, and Lys212 is*  
163 *shown. Note that Glu<sub>gate</sub> remained at the same position regardless of the transmembrane*  
164 *voltage.*

165 First, we determined whether the closed Glu<sub>gate</sub> position was altered by hyperpolarization or  
166 depolarization in Cl<sup>-</sup>-free pores (pore 2 of  $^-\text{CLC-2}^{\text{CLC-K}}$  and pores 1 and 2 of  $^+\text{CLC-2}^{\text{CLC-K}}$ ). Relative to  
167 0 mV, we observed little or no changes in the position of Tyr561, Glu<sub>gate</sub>, and Lys212 at positive

168 or negative voltages (Fig. 2). Regardless of voltage, Glu<sub>gate</sub> was stabilized by H-bonds formed at  
169 different times with either the -OH group of Tyr561 via one H<sub>2</sub>O molecule (97% of the total  
170 simulation time; lifetime 63-116 ps) or with -NH group of residues <sub>466</sub>AF<sub>467</sub> and <sub>212</sub>KEG<sub>214</sub> (3%,  
171 lifetime 2.9-4.4 ps), and by direct interaction with Tyr561 (0.12%). When a +940 mV was applied  
172 to <sup>+</sup>CLC-2<sup>CLC-K</sup>, the Glu<sub>gate</sub> in pore 1 was pushed inwardly and displaced the water molecule that  
173 bridges Tyr561 and Glu<sub>gate</sub> (Fig. 2A, cyan). This displacement increased the Tyr561-Glu<sub>gate</sub> direct  
174 interaction to 40%. Thus, voltage alone cannot open the CLC-2 gate.

175 Second, we examined the structural rearrangements that residues lining pore 1 of <sup>-</sup>CLC-2<sup>CLC-K</sup>  
176 underwent at negative voltage when five Cl<sup>-</sup> ions occupied the pore (Cl<sup>-</sup>1-Cl<sup>-</sup>5). Based on the  
177 time ( $\geq 1$  ns) that a Cl<sup>-</sup> ion spent on sections along the pore, we defined four putative binding  
178 sites: intracellular S<sub>i</sub> formed by Lys568 and Glu174, central S<sub>c</sub> formed by Tyr561 and Ile172,  
179 external S<sub>e</sub> formed by <sub>465</sub>GlyAlaPhe<sub>467</sub>, and exit S<sub>o</sub> formed by Lys212 and Glu213. Figure 3A  
180 shows snapshots of pore 1 of <sup>-</sup>CLC-2<sup>CLC-K</sup> at 0, 24, 37, 470, 513, 526, 541, 564, 579, 605, 654, and  
181 663 ns into the MD simulation (arrowheads in the site occupation roster, right side of Fig. 3B).  
182 The snapshots depict the journey of Cl<sup>-</sup>3 through the entire pore in five steps:

183 *Pore occupation.* Figure 3A (snapshot at 0 ns and -94 mV) shows pore residues and 8 water  
184 molecules to indicate an empty permeation pathway closed by Tyr561-H<sub>2</sub>O-Glu<sub>gate</sub> gate. The  
185 side chains of Lys568 and Glu174 fluctuated between 2-5 Å. Figure 3B shows that Cl<sup>-</sup>1 and Cl<sup>-</sup>2  
186 occupied S<sub>i</sub> for 11.5 and 3.4 ns and then spontaneously returned to the intracellular side. As Cl<sup>-</sup>  
187 ions visited the pore, the side chains of Lys568 and Glu174 became closer (2 Å). Then Cl<sup>-</sup>3  
188 occupied S<sub>i</sub> during 3.5 ns (Figs. 3A and 3B, snapshot at 24 ns).

189 *Disruption of Tyr561-H<sub>2</sub>O-Glu<sub>gate</sub>.* Cl<sup>-</sup>3 moved to S<sub>c</sub> (snapshot at 37 ns) disrupting the water  
190 bridge between Tyr561 and Glu<sub>gate</sub> and binding to Tyr561. The electrostatic and steric forces (or  
191 electro-steric forces) repelled Glu<sub>gate</sub> outwardly. Subsequently, Glu<sub>gate</sub> interacted with the  
192 Lys212 side chain and the <sub>213</sub>EG<sub>214</sub> backbone. Unlike in the empty pore, now Glu<sub>gate</sub> stopped  
193 interacting with Gly214, folded in itself and remained attached to its backbone 59% of the time  
194 (lifetime 12.5 ps). Simultaneously, the number of H-bonds between Glu<sub>gate</sub> and Lys212 increased  
195 from 1 to 3 during 98.8% of the simulated time (CompEI protocol; lifetime 274 ps). To accelerate  
196 the permeation process, we increased the voltage from -94 to -940 mV at t = 145 ns and this  
197 stabilized Cl<sup>-</sup>3 at S<sub>e</sub> (Fig. 3B; snapshot at 470 ns). The majority of the time Cl<sup>-</sup>3 dwelt between S<sub>c</sub>  
198 (133 ns) and S<sub>e</sub> (320 ns) (Fig. 3B) and S<sub>e</sub> became closer to S<sub>o</sub> because <sub>212</sub>LysGlu<sub>gate</sub> adopted an  
199 intermediate position between the closed and open configurations (Supplementary Fig. 2A).

200 *Glu<sub>gate</sub> protonation.* We had reported that Glu<sub>gate</sub> is stabilized in the open conformation by  
201 extracellular H<sup>+</sup> in a voltage-independent manner (Sánchez-Rodríguez et al., 2012). Hence, we  
202 asked whether protonation was necessary to disentangle Glu<sub>gate</sub> from S<sub>e</sub>. At t = 484 ns (Fig. 3A),  
203 the carboxyl group of Glu<sub>gate</sub> was protonated using CHARMM-GUI. After protonation (snapshot  
204 at t = 513), the H-bond between Glu<sub>gate</sub> and Lys212 was lost; Cl<sup>-</sup>3 stayed for 10.5 ns on S<sub>e</sub> and  
205 then occupied S<sub>o</sub> (snapshot at 526 ns).

206 *Multi-ion pore occupancy.* After disengaging Glu<sub>gate</sub> from Lys212, Cl<sup>-</sup>4 entered and interacted  
207 with S<sub>i</sub> for 22 ns (snapshot at 526 ns). Then Cl<sup>-</sup>4 jumps (snapshot at 541 ns) and fluctuates  
208 between S<sub>c</sub> (for 14.4 ns) and S<sub>e</sub> (57.1 ns). The hop of Cl<sup>-</sup>4 into S<sub>c</sub> tilts Lys212 counter-clockwise by  
209 about 45° without altering Glu<sub>gate</sub>.



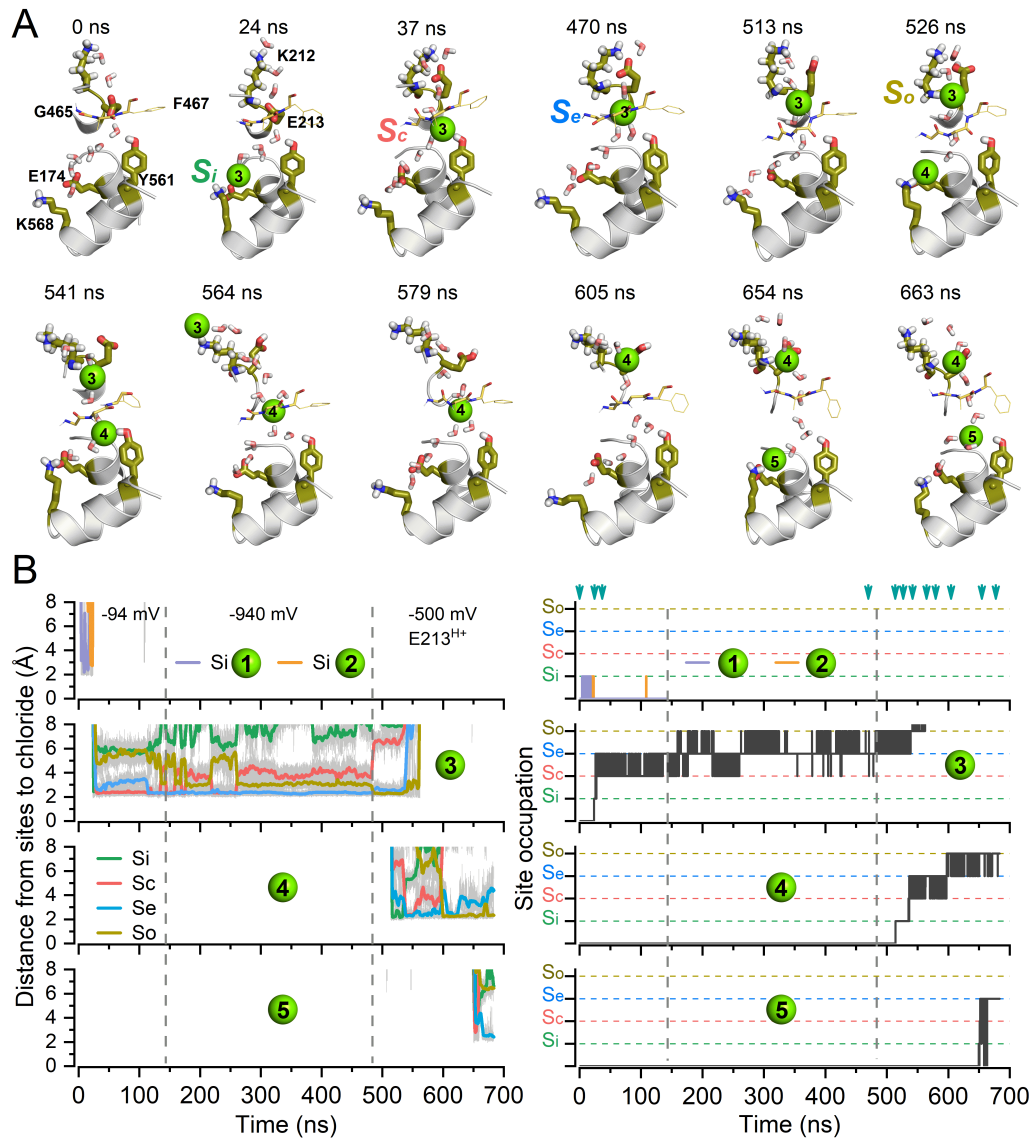

210

211 **Fig. 3 Coupling gating to permeation enables CLC-2 activation at the molecular level.**

212 A. Snapshots of structural rearrangements of key residues located in pore 1 of  $\text{CLC-2}^{\text{CLC-K}}$

213 channel sampled by MD simulation at the times indicated on top of each structure. Ball and

214 stick representation of Lys568, Glu174, Tyr561, Glu213, Gly465, Ala466, Phe467, and Lys212

215 along with eight water molecules illustrate the canonical permeation pathway (snapshots at

216 0 and 24 ns). Green spheres represent  $\text{Cl}^-$  ions. Hyperpolarisations applied were -94, -940,



217 and -500 mV. Snapshots are representative of pore occupation (24 ns), displacement of  
218  $\text{Glu}_{\text{gate}}$  (37 and 470 ns),  $\text{Glu}_{\text{gate}}$  protonation (513 ns), double occupancy (526 and 541 ns) and  
219 exit of  $\text{Cl}^-$  from the pore (564 and 579 ns). Snapshots at 605, 654, and 663 ns illustrate  
220 changes in permeation caused by double occupancy. Residues participating in  $\text{Cl}^-$  transport  
221 and gating ( $\text{Glu174}$ ,  $\text{Lys568}$ ,  $\text{Tyr561}$ ,  $\text{Glu213}$ , and  $\text{Lys212}$ ) are shown in olive. The internal  
222 ( $\text{Lys568-Glu174}$ , green), centre ( $\text{Tyr561}$ , pink), external ( $_{465}\text{GAF}_{467}$ , blue), and extracellular  
223 ( $_{212}\text{KEG}_{213}$ , olive) sites that are occupied by  $\text{Cl}^-$  along the pore are labelled as  $S_i$ ,  $S_o$ ,  $S_e$ , and  $S_o$ ,  
224 respectively.

225 B. Left: The distance separating  $\text{Cl}^-$  from the binding sites ( $S_i$ ,  $S_o$ ,  $S_e$ , and  $S_o$ ) is shown as a  
226 function of the simulation time. Right: Site occupation determined by the time spent by  $\text{Cl}^-$  at  
227 each binding site during the simulation. Five  $\text{Cl}^-$  ions visited the intracellular side of the pore  
228 during the entire 680 ns MD simulation. Of these, only  $\text{Cl}^-3$ ,  $\text{Cl}^-4$  and  $\text{Cl}^-5$  occupied the pore.  
229  $\text{Cl}^-1$  (lavender) and  $\text{Cl}^-2$  (light green) at the top, next  $\text{Cl}^-3$ , then  $\text{Cl}^-4$ , and  $\text{Cl}^-5$  at the bottom.  
230 Dashed vertical lines indicate the time when the transmembrane voltage was changed from -  
231 94 to -940 mV and from 940 to -500 mV. -94 and -940 mV was applied using CompEl. -500  
232 mV was applied using an electric field after  $\text{Glu213}$  was protonated ( $\text{E213}^{\text{H}^+}$ ). Cyan  
233 arrowheads on the top (right panel) indicate times at which the snapshots shown in A were  
234 captured.

235  
236 Pore exit. Further outward movement of  $\text{Cl}^-4$  near  $S_o$  induced straightening of  $\text{Lys212}$  and placed  
237  $\text{Cl}^-3$  onto the  $\text{Lys212}$  side chain end for 66.7 ns (Fig. 3A, snapshot at 564 ns). The total  
238 conformational change translated the  $_{212}\text{KEG}_{214}$  backbone  $\sim 6$  Å away from the closed position

239 (Supplementary Fig. 2B and Fig. 2C). The lengthy interaction of Cl<sup>-</sup>3 with S<sub>o</sub> could be explained  
240 by an enhancement of the electrostatic potential at Lys212 position in the open state  
241 (Supplementary Fig. 3). Finally, Cl<sup>-</sup>3 escapes the pore (snapshot at t = 579 ns) ending its 580 ns  
242 journey while Cl<sup>-</sup>4 sits onto S<sub>o</sub> for 76 ns (snapshot at t = 605 ns). At this time, Cl<sup>-</sup>5 occupies S<sub>i</sub> (for  
243 1.1 ns, snapshot at 654 ns), then S<sub>c</sub> (for 4.5 ns, t = 663 ns), and S<sub>e</sub> (for 27.4 ns) signalling that the  
244 pore is fully open/conductive and that Cl<sup>-</sup>4 is near to exit the pore.

245 These steps, stitched in the video, agree with previous results emphasizing that CLC-2 gating  
246 requires intracellular Cl<sup>-</sup>, protonation by external H<sup>+</sup>, and multi-ion occupancy(De Jesús-Pérez et  
247 al., 2016; Sánchez-Rodríguez et al., 2012, 2010).

#### 248 **Video: 1 CLC-2 Activation mechanism**

249 *Trajectory of Cl<sup>-</sup>3 along the pore at -94 mV (0-47 ns) and after protonation of Glu<sub>gate</sub> at -500 mV*  
250 *(485-660 ns). Pore 1 of <sup>-</sup>CLC-2<sup>CLC-K</sup> is shown. Membrane surface profile (phosphates) is*  
251 *represented by grey spheres. Lys568, Glu174, Tyr561, Glu213, Gly465, Ala466, Phe467, and*  
252 *Lys212 are represented in olive sticks, Cl<sup>-</sup> in green spheres, and helix in white. Top side =*  
253 *extracellular side; lower side = intracellular side.*

#### 254 **Tyr561-H<sub>2</sub>O-Glu<sub>gate</sub> array controls gating.**

255 Earlier studies with CLC-0 and CLC-1 carrying a Tyr mutation in the pore showed no change in  
256 conductance between WT and mutant channels(Accardi and Pusch, 2003; Estévez et al., 2003;  
257 Ludwig et al., 1996). Those studies led to the conclusion that Tyr561 plays no role in CLC-2  
258 gating(McKiernan et al., 2020). However, our MD simulations show otherwise. We revealed the

259 role of Tyr561 by mutagenesis and functional studies. The activity of Tyr561Phe, Tyr561Ala and  
260 Glu213Asp mutant channels was determined using both patch-clamp and cut-open oocyte  
261 voltage-clamp techniques. The Tyr561Ala mutant channel shows currents in both directions  
262 revealing an open channel phenotype (Fig. 4A) while WT and Tyr561Phe channels displayed  
263 currents with similar kinetics. Similarly, we reasoned that the Tyr561-H<sub>2</sub>O-Asp213 array in the  
264 Glu213Asp mutant loses stability and mimics the gating behaviour of Tyr561Ala. Indeed, positive  
265 voltages activate the Glu213Asp channel but negative voltages induce currents similar to those  
266 of WT; tail currents were smaller and faster.

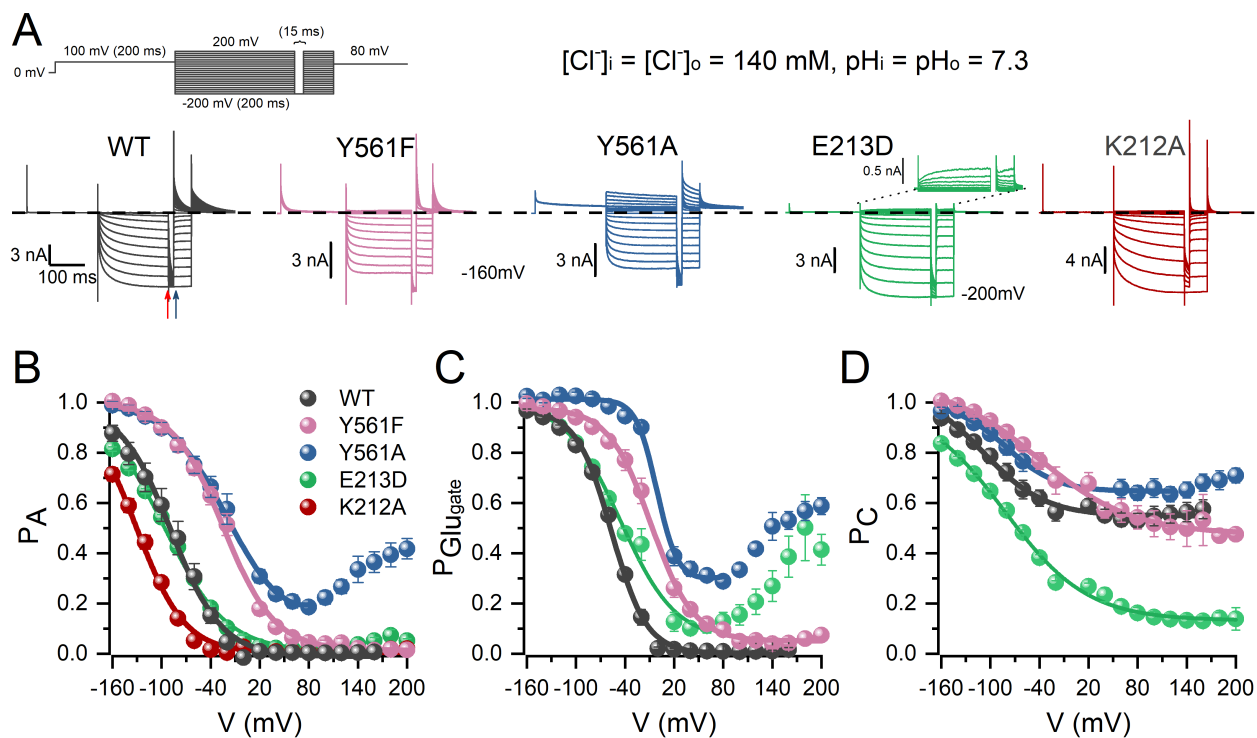

267

268 **Fig. 4 Tyr561 and Glu213 control voltage-dependent activation.**

269 A. Cl<sup>-</sup> currents (colour-coded) recorded from 5 different HEK293 cells expressing WT CLC-2 (WT),

270 Tyr561Phe (Y561F), Tyr561Ala (Y561A), Glu213Asp (E213D), and Lys212Ala (K212A). Cl<sup>-</sup>

271 currents were elicited by the voltage protocol shown in the upper panel. The protocol  
272 consisted in depolarization steps from -200 to 200 mV in 20 mV increments; we introduced  
273 an inter-pulse of 15 ms at -200 mV to reach  $P_{Glu_{gate}} = 1$  and a repolarization voltage to +80  
274 mV to record tail currents.  $Cl^-$  currents were acquired using  $pH_i = pH_o = 7.3$  and  $[Cl^-]_i = [Cl^-]_o =$   
275 140 mM. Dash line indicates  $I_{Cl} = 0$ .

276 B. Apparent open probability ( $P_A$ ) computed for WT CLC-2, Tyr561Phe, Tyr561Ala, Glu213Asp,  
277 and Lys212Ala. Continuous lines represent data fitted with the Boltzmann equation to  
278 determine voltage-dependent parameters  $V_{0.5}$  and  $z$ , listed in Table 1.

279 C. ,D. Voltage dependence of  $Glu_{gate}$  ( $P_{Glu_{gate}}$ ) and common gate ( $P_C$ ) obtained for WT CLC-2,  
280 Tyr561Phe, Tyr561Ala, Glu213Asp, and Lys212Ala. The probability of each gate was  
281 calculated as described in the methods section. Continuous lines are fits to Boltzmann equation  
282 to determine the voltage-dependent parameters ( $V_{0.5}$  and  $z$ ) listed in Table 1.

283 Values for the parameters ( $V_{0.5}$  and  $z$ ) describing the voltage dependence of apparent open  
284 probability ( $P_A$ ),  $Glu_{gate}$  open probability ( $P_{Glu_{gate}}$ ), and common gate open probability ( $P_C$ ) (De  
285 Santiago et al., 2005) (Figs. 4B, 4C, and 4D) are summarized in Table 1. The  $V_{0.5}$  (mV)/ $z$  values for  
286  $P_A$ , of WT and Glu213Asp channels were quite similar:  $-89.3 \pm 8.5/-0.84 \pm 0.04$  and  $-97.8 \pm 3.3 /-$   
287  $0.64 \pm 0.01$ , respectively. In contrast, the  $V_{0.5}$  values for both Tyr561Phe and Tyr561Ala mutants  
288 displayed a large rightward shift without changing  $z$  (Fig. 4B, Table 1). The changes mainly  
289 involved  $P_{Glu_{gate}}$   $V_{0.5}$  values (Fig. 4C). For Tyr561Phe and Tyr561Ala, the  $P_{Glu_{gate}}$   $V_{0.5}$  values were  
290 rightward shifted by  $\sim +50$  mV relative to WT  $P_{Glu_{gate}}$  ( $-56.6 \pm 1.0$  mV). Notable, although both  
291 Glu213Asp and Tyr561Ala displayed reopening of " $Glu_{gate}$ " at positive voltages, the  $V_{0.5}$  value for  
292 Glu213Asp was similar to that of WT. Overall, the voltage dependence of  $P_C$  (Fig. 4D) seems to

293 be quite similar in WT, Tyr561Phe, and Tyr561Ala. However, the voltage dependence of  $P_C$  in  
 294 Glu213Asp indicates that the common gate starts to close at voltages that are more negative  
 295 and is fully closed at positive voltages. These results indicate that Tyr561 keeps Glu<sub>gate</sub> closed; a  
 296 conclusion further supported by WT, Tyr561Phe, and Tyr561Ala data collected using the cut-  
 297 open oocyte technique (Supplementary Fig. 4 and Table 1).

| Channel   | $V_{0.5}^{PA}$ (mV) | $z_{PA}$     | $V_{0.5}^{PP}$ (mV) | $z_{PP}$     | $V_{0.5}^{PC}$ (mV) | $z_{PC}$     | Er (mV)    | pH <sub>i</sub> | [Cl <sup>-</sup> ] <sub>o</sub> (mM) | n  |
|-----------|---------------------|--------------|---------------------|--------------|---------------------|--------------|------------|-----------------|--------------------------------------|----|
| WT-HEK    | -89.3 ± 8.5         | -0.84 ± 0.04 | -56.6 ± 1.0         | -1.17 ± 0.07 | -110.9 ± 6.3        | -0.75 ± 0.03 |            | 7.3             | 140                                  | 5  |
| WT-OOC    | -96.9 ± 7.5         | -0.87 ± 0.04 | -72.3 ± 1.4         | -1.24 ± 0.10 | -115.1 ± 5.5        | -1.17 ± 0.13 |            | 7.3             | 140                                  | 7  |
| WT        | -79.1 ± 5.8         | -0.79 ± 0.07 | -39.5 ± 2.2         | -1.19 ± 0.07 | -82.9 ± 6.1         | -0.54 ± 0.04 | 57.4 ± 0.6 | 7.3             | 10                                   | 5  |
| Y561F-HEK | -34.8 ± 9.4         | -0.8 ± 0.0   | -13.8 ± 6.4         | -1.1 ± 0.1   | -51.2 ± 6.4         | -0.4 ± 0.0   |            | 7.3             | 140                                  | 9  |
| Y561F-OOC | -29.7 ± 7.6         | -0.57 ± 0.05 | -5.66 ± 9.9         | -0.71 ± 0.05 | -37.3 ± 17.9        | -0.62 ± 0.1  |            | 7.3             | 140                                  | 7  |
| Y561F     | -68.9 ± 5.4         | -0.67 ± 0.02 | -6.3 ± 4.4          | -0.73 ± 0.04 | -71.9 ± 4.5         | -0.62 ± 0.07 | 52.5 ± 1.6 | 7.3             | 10                                   | 6  |
| Y561F     | -40.0 ± 4.5         | -0.77 ± 0.04 | -21.6 ± 2.2         | -0.95 ± 0.08 | -36.1 ± 7.9         | -0.53 ± 0.06 |            | 5.5             | 140                                  | 8  |
| Y561F     | -60.3 ± 17.8        | -0.73 ± 0.08 | -17.9 ± 8.6         | -1.09 ± 0.17 | -78.7 ± 23.2        | -0.63 ± 0.06 |            | 4.3             | 140                                  | 5  |
| Y561A-HEK | -30.4 ± 5.9         | -0.84 ± 0.09 | -4.1 ± 2.5          | -1.48 ± 0.12 | -65.6 ± 10.6        | -0.81 ± 0.06 |            | 7.3             | 140                                  | 7  |
| Y561A-OOC | -37.4 ± 6.1         | -0.85 ± 0.04 | -41.8 ± 15.2        | -1.18 ± 0.08 | -64.0 ± 1.88        | -1.05 ± 0.01 |            | 7.3             | 140                                  | 3  |
| Y561A     | -58.6 ± 8.6         | -0.63 ± 0.01 | 25.8 ± 4.7          | -1.08 ± 0.06 | -74.5 ± 7.3         | -0.64 ± 0.07 | 57.5 ± 0.8 | 7.3             | 10                                   | 6  |
| Y561A     | -31.7 ± 6.5         | -0.82 ± 0.07 | -13.4 ± 2.6         | -1.04 ± 0.08 | -77.2 ± 15.9        | -0.98 ± 0.16 |            | 5.5             | 140                                  | 9  |
| Y561A     | -38.6 ± 8.0         | -0.89 ± 0.15 | -12.7 ± 5.2         | -1.26 ± 0.09 | -66.7 ± 12.1        | -0.77 ± 0.07 |            | 4.3             | 140                                  | 10 |
| E213D     | -97.8 ± 3.3         | -0.64 ± 0.01 | -44.6 ± 3.6         | -0.82 ± 0.05 | -86.0 ± 6.1         | -0.51 ± 0.01 |            | 7.3             | 140                                  | 8  |
| K212      | -130.7 ± 3.6        | -1.16 ± 0.03 | --                  | --           | --                  | --           | --         | 7.3             | 140                                  | 6  |

298  
 299 **TABLE 1. Effect of  $[H^+]_i$  and  $[Cl^-]_o$  on the voltage-dependent parameters of WT and mutants**  
 300 **CLC-2 channels.**  $V_{0.5}^{PA}$  = voltage to reach an open probability of 0.5,  $z_{PA}$  = apparent charge of the  
 301 open-closed transition,  $V_{0.5}^{PP}$  = voltage to reach a 0.5 open probability of Glu<sub>gate</sub>,  $z_{PP}$  = apparent  
 302 of Glu<sub>gate</sub> charge,  $V_{0.5}^{PC}$  = voltage to reach a 0.5 open probability of the common gate,  $z_{PC}$  =  
 303 apparent charge the common gate. These parameter values were calculated by fitting the data  
 304 to the Boltzmann equation (Equation 1). Er = reversal potentials determined by current-voltage

305 *relationship interpolations. HEK = data collected from HEK 293 cells; OOC = data collected from*  
306 *cut-open oocytes.*

307 MD simulations suggest that Lys212 is relevant for Cl<sup>-</sup> exit. To confirm the role of Lys212, we  
308 first calculated the electrostatic potential in the closed and open pores of WT and <sup>CLC-K</sup>CLC-2  
309 Lys212Ala mutant (produced *in silico*). The electrostatic potential decreased from -26 Kcal/mol  
310 to -12 Kcal/mol (closed) and from -52 Kcal/mol to -40 Kcal/mol (open) after mutating Lys212  
311 (Supplementary Fig. 3). Then, we determined the voltage dependence of P<sub>A</sub> from whole cell  
312 recordings of the Lys212Ala mutant channel (Fig. 4A). Mutant channels activated with kinetics  
313 similar to that of WT; at -200 mV, the time constants of the fast kinetic component were 3.2 ±  
314 0.7 ms and 3.8 ± 0.5 ms, for the slow component were 41.0 ± 3.9 ms and 40.1 ± 7.9 ms for  
315 mutant and WT, respectively. Unlike WT, the mutant channels had very fast closing; at +80 mV,  
316 the time constants were 4.7 ± 0.24 ms for mutant and 59.4 ± 4.8 ms for WT. This result indicates  
317 that Lys212 helps to keep the pore in the open conformation. In agreement with this idea, the  
318 voltage dependence of P<sub>A</sub> in the Lys212Ala mutant channel (Fig 4B; Table 1) was shifted to  
319 negative voltages (V<sub>0.5/z</sub> = -130.7±3.6 mV/1.16±0.03).

320 WT CLC-2 has low sensitivity to extracellular [Cl<sup>-</sup>] ([Cl<sup>-</sup>]<sub>o</sub>)(Sánchez-Rodríguez et al., 2010).  
321 However, Glu<sub>gate</sub> could become sensitive to [Cl<sup>-</sup>]<sub>o</sub> when is dislodged, as in the Tyr561Ala mutant  
322 (Fig. 4). The Cl<sup>-</sup> influx in Tyr561 mutants would knock off Glu<sub>gate</sub> inwardly just as the Cl<sup>-</sup> efflux  
323 knocks off the WT Glu<sub>gate</sub> outwardly. Under whole cell condition, the [Cl<sup>-</sup>]<sub>o</sub> was changed from  
324 140 to 10 mM, this manoeuvre decreased Cl<sup>-</sup> influx but had little effect on the kinetics of WT,  
325 Tyr561Phe, and Tyr561Ala currents (Fig. 5A, 5B and 5C). The voltage dependence of P<sub>A</sub> and  
326 P<sub>Glu<sub>gate</sub></sub> in the WT channel was little or not affected by varying the [Cl<sup>-</sup>]<sub>o</sub> (Fig. 5A, Table 1).

327 However, in Tyr561Phe channels (Fig. 5B), we observed a -34 mV shift on  $V_{0.5}$  of  $P_A$  with little  
328 effect on  $P_{Glu_{gate}}$  (Table 1). A severe alteration of the voltage dependence of both  $P_A$  and  $P_{Glu_{gate}}$   
329 was observed in the Tyr561Ala mutant at positive voltages (Fig. 5C). In this mutant, the voltage  
330 dependence of  $P_A$  was shifted by about -29 mV and re-opening at positive voltages was  
331 abolished by lowering the  $[Cl^-]_o$  from 140 to 10 mM. Similarly,  $P_{Glu_{gate}}$  was strongly diminished at  
332 positive voltages. That is, decreasing the  $Cl^-$  influx decreased the open probability of  $Glu_{gate}$  at  
333 positive potentials in the Tyr561Ala mutant channel. In contrast, the effect of low  $[Cl^-]_o$  on  $V_{0.5}$   
334 of  $P_C$  was nearly the same in WT, Tyr561Phe and Tyr561Ala channels ( $V_{0.5}$  were between -71 to -  
335 82 mV, Table 1). The common gate tended to close at low external  $Cl^-$  conditions.

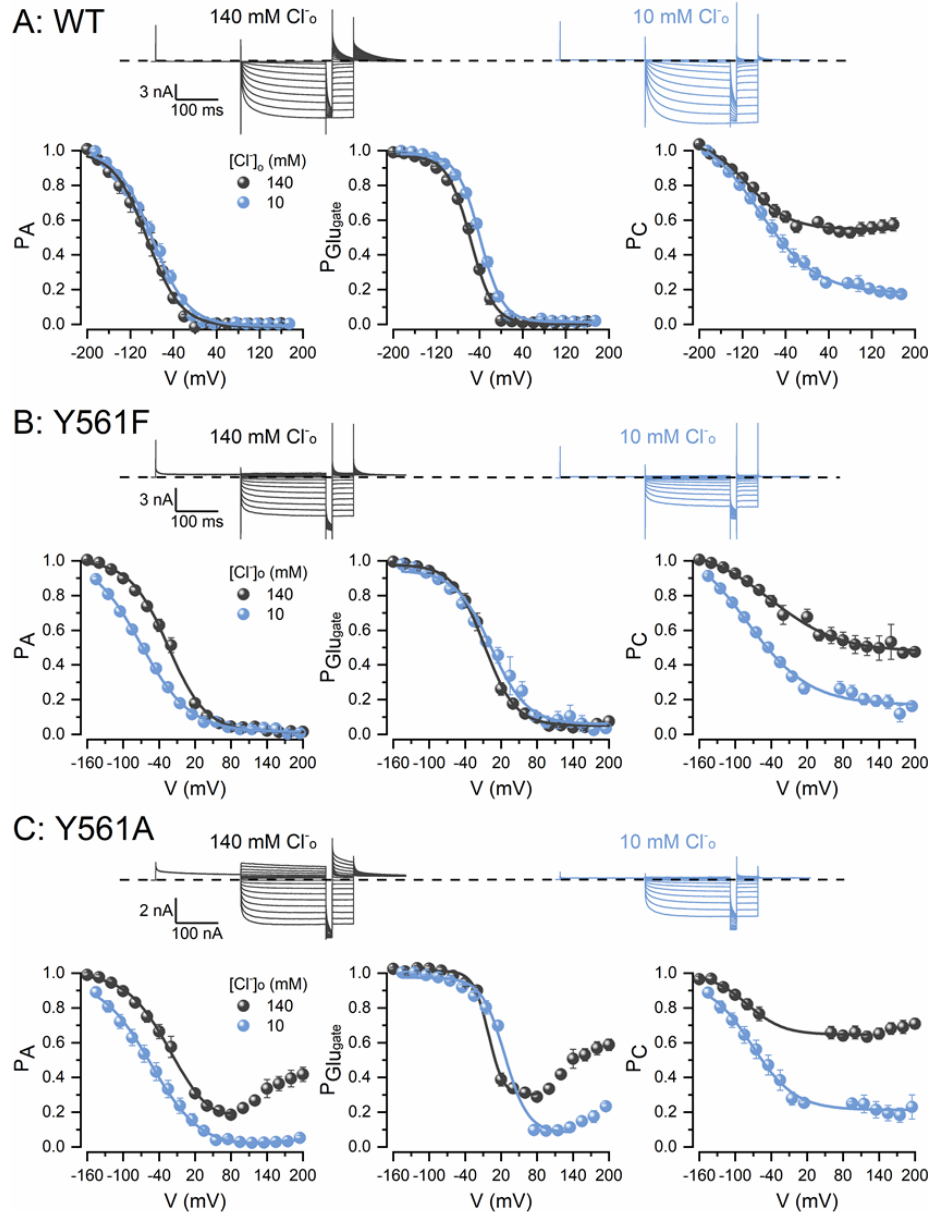

336

337 **Fig. 5** *TMEM16A* channels that have Tyr561 mutated to Phe or Ala are sensitive to

338 **extracellular chloride.**

339 A,B,C. Top panels:  $\text{Cl}^-$  currents recorded from the same HEK293 cell expressing WT CLC-2 (A),

340 Tyr561Phe (B), or Tyr561Ala (C) exposed first to 140 (grey) and then 10 (blue) mM  $[\text{Cl}^-]_o$  at

341  $\text{pH}_o = 7.3$ . Channels were activated using the voltage protocol shown in Fig. 4A.



342 *A,B,C. Bottom panels: Voltage dependence of  $P_A$  (left),  $P_{Glu_{gate}}$  (middle), and  $P_C$  (right) for WT*  
343 *CLC-2 (A), Tyr561Phe (B) and Tyr561Ala (C) determined first with 140 (grey) and then with 10*  
344 *(blue) mM extracellular Cl<sup>-</sup>.  $[Cl^-]_i = 140$  mM and  $pH_i = pH_o = 7.3$ . Lines are fits of the data with*  
345 *Boltzmann equation. Voltage-dependent parameters  $V_{0.5}$  and  $z$  are listed in Table 1.*

346 To determine the conformational state of Glu<sub>gate</sub> when Try561 is mutated, we analysed the pore  
347 structures of Tyr561Phe and Tyr561Ala mutants made *in-silico*. In contrast to the WT CLC-2  
348 pores, the pore structures of Tyr561Phe and Tyr561Ala show a disordered Tyr561-H<sub>2</sub>O-Glu<sub>gate</sub>  
349 array in both pores (Supplementary Fig. 5). Although Glu<sub>gate</sub> still interacted through H-bonds  
350 with the -NH groups of <sub>466</sub>AF<sub>467</sub> and <sub>212</sub>KEG<sub>214</sub>, the Tyr561Phe-H<sub>2</sub>O-Glu<sub>gate</sub> bridge was formed  
351 only 16% of the time whereas the bridge Tyr561Ala-H<sub>2</sub>O-Glu<sub>gate</sub> was not formed at all. Hence,  
352 the Tyr561-H<sub>2</sub>O-Glu<sub>gate</sub> array is critical for maintaining the pore in a closed state.

353 **The anomalous mole fraction behaviour of CLC-2 activation reveals the multi-ion occupancy of**  
354 **the pore.**

355 MD simulations show that Cl<sup>-</sup> can disrupt the Tyr561-H<sub>2</sub>O-Glu<sub>gate</sub> array and that Cl<sup>-</sup> exit is  
356 facilitated when the pore is occupied by two Cl<sup>-</sup> ions. These observations are in agreement with  
357 the idea that multi-ion occupancy(Hille, 2001) facilitates permeation by a knock-on  
358 mechanism(Khalili-Araghi et al., 2006; Kratochvil et al., 2016). To reveal the multi-ion occupancy  
359 of wild type CLC-2 channels we determine the anomalous mole fraction (AMF) behaviour using  
360 different acetate/Cl<sup>-</sup> mole-fractions. As the acetate mole-fraction increased, we recorded less  
361 inward Cl<sup>-</sup> currents and the depolarization-induced tail currents that saturated at less positive  
362 voltages (Fig. 6A). Increasing the acetate mole fraction shifted the voltage-dependent activation

363 curves first to the right and then to the left on the voltage axis (Fig. 6B). The corresponding  $V_{0.5}$   
 364 values, when plotted against the acetate/ $\text{Cl}^-$  mole fractions, had a concave shape and peaked at  
 365 0.57 (Fig. 5D, black spheres). These data support the idea that multi-anion occupancy of the  
 366 pore controls CLC-2 gating. If acetate and  $\text{Cl}^-$  occupy the pore then both anions contribute to the  
 367 AMF dependence. To test this idea, we dialyzed the cells with acetate mole fractions that had  
 368 the pH adjusted to 4.2 to protonate 79% of the acetate. Under this condition, we did not find  
 369 evidence of AMF dependence in voltage activation (Fig. 6C).  $V_{0.5}$  had a linear relationship with  
 370 acetate/ $\text{Cl}^-$  mole-fractions (Fig. 6D, open circles), a behaviour similar to that observed with pure  
 371  $\text{Cl}^-$  solutions adjusted to pH 7.3 (Fig. 6D, green squares)(Sánchez-Rodríguez et al., 2010). This  
 372 result also indicates that intracellular  $\text{Cl}^-$  but not intracellular  $\text{H}^+$  control voltage activation.

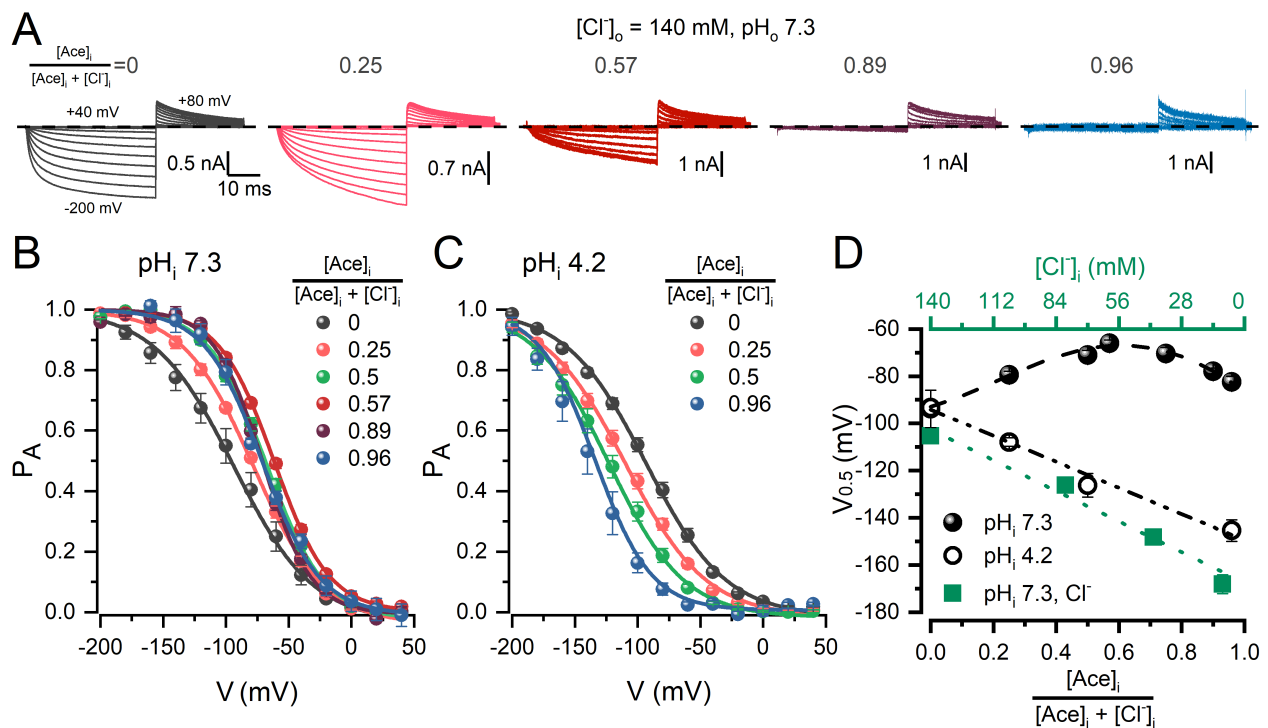

373

374 **Fig. 6 Multi-ion pore occupancy regulates voltage-dependent activation.**

375 A. Whole cell currents recorded from 5 different HEK cells expressing WT CLC-2 dialyzed with 0,  
376 0.25, 0.57, 0.89, and 0.96 acetate mole fractions ( $[Ace]_i/([Ace]_i+[Cl]_i)$ ). Currents were elicited  
377 by depolarization steps from -200 to +40 mV in increments of 20 mV. Tail currents were  
378 recorded at +80 mV.  $[Cl]_o = 140$  mM,  $pH_e = pH_i = 7.3$ . Dash line indicates the 0 current level.

379 B,C. Voltage-dependent activation determined at  $pH_i$  of 7.3 (B) and 4.2 (C) using different  
380 acetate mole fractions.  $P_A$  was calculated using the tail current magnitude. The resulting  
381 curves were normalized to their respective tail current maximum obtained after fitting with  
382 the Boltzmann equation. Continuous lines are fits from which the voltage-dependent  
383 parameter  $V_{0.5}$  and  $z$  were computed.

384 D.  $V_{0.5}$  plotted against acetate mole fractions (circles) and  $[Cl]_i$  (squares). Filled symbols  
385 correspond to data obtained at  $pH_i$  7.3 whereas open symbols were collected at  $pH_i$  4.2.  $V_{0.5}$   
386 values were obtained from Boltzmann fits to data shown in panels B and C. Similar data  
387 collected using intracellular solutions that contained unmixed Cl at  $pH_i = 7.3$  was used to  
388 calculate  $V_{0.5}$  (green squares).

389 **Tyr561-H<sub>2</sub>O-Glu<sub>gate</sub> array inhibits Glu<sub>gate</sub> protonation from the intracellular side.**

390 A remarkable difference between CLC-0/CLC-1 and CLC-2 is their contrasting sensitivity to  
391 intracellular H<sup>+</sup>. CLC-0 and CLC-1 require Glu<sub>gate</sub> protonation for activation whereas CLC-2 does  
392 not (Rychkov et al., 1996; Sánchez-Rodríguez et al., 2012; Traverso et al., 2006b). The recent  
393 structure of hCLC-1 shows a bifurcation of the permeation pathway at the cytosolic side (Park  
394 and MacKinnon, 2018). For CLC exchangers this alternative pathway enables protonation of the

395 Glu<sub>gate</sub> from the cytosolic side (Accardi et al., 2005). Our CLC-2 homology structures show the  
396 presence of an uncoupled aqueous cavity at the same position as in CLC exchangers and hCLC-1  
397 channels (Fig. 1C). Also, the homology model shows that Tyr561, Ile172, Phe269 and Thr520, all  
398 hydrophobic residues, form a shield that faces the aqueous lacuna. We propose that these  
399 residues form a hydrophobic gate that prevents pore bifurcation. The structures of Tyr561Phe  
400 and Tyr561Ala shown in Figs. 7A and 7E, respectively, support this idea. The pore in Tyr561Phe  
401 channels is occasionally bifurcated (Fig. 7A) but it becomes permanently bifurcated only in the  
402 Tyr561Ala mutant (Fig. 7E). The bifurcation creates a forked water chain that exposes Glu<sub>gate</sub> to  
403 both the alternative and the canonical pathways. The hydrophobic gates of Tyr561Phe and  
404 Tyr561Ala channels are shown in Figs. 7B and 7F, respectively, with yellow dashed lines  
405 indicating the distance between paired residues. Fig. 7D shows distances between Phe269-  
406 Tyr561 and Thr520-Ile172 in the two pores of WT CLC-2 and between Phe269-Tyr561Phe and  
407 Thr520-Ile172 in the two pores of Tyr561Phe mutant channel. The distances remained around 3  
408 Å and 6 Å, respectively, in both pairs, except for pore 2 in Phe269-Tyr561Phe which was about 6  
409 Å. In contrast, the equivalent distances in both pores of the Tyr561Ala mutant increased to  
410 around 5-11 Å (Fig. 7H). The consequence of these distortions in the hydrophobic gate was a  
411 widening of the alternative pore radius with minimal effects on the canonical pore radius (Fig.  
412 7C and 7G). The radius of the alternative pore in Tyr561Ala mutant became nearly identical to  
413 the radius of the intracellular portion of the WT canonical pore (Fig. 1D). The alternative pore of  
414 Tyr561Ala is wider than that of Tyr561Phe, which allowed the formation of the forked water  
415 chain.

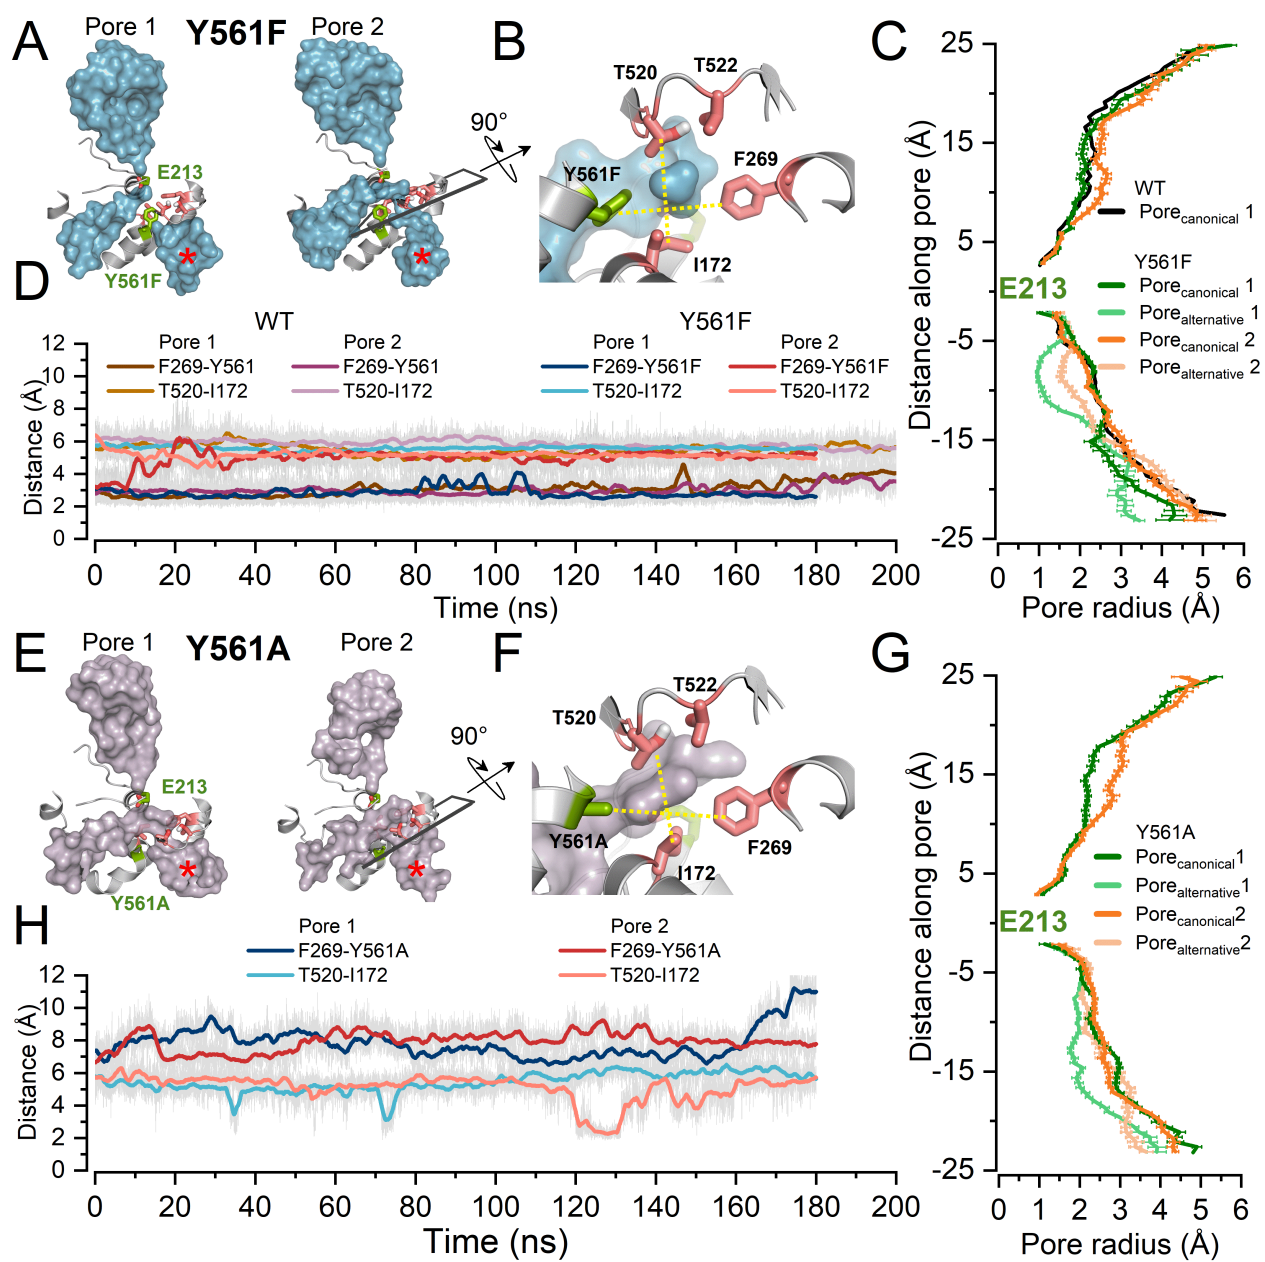

416  
 417 **Fig. 7 The canonical pores of CLC-2 are uncoupled from an alternative pathway leading to the**  
 418 **cytosol via a hydrophobic gate formed by Tyr561, Ile172, Phe269, and Thr20.**

419 *A,E. Canonical pores and the alternative pathways (indicated by red asterisks) are*  
 420 *represented by the surface of water molecules in Tyr561Phe (A) and Tyr561Ala (E) mutants*  
 421 *after 180 ns MD simulation at -500 mV. Residues Tyr561Phe, Tyr561Ala, and Glu<sub>gate</sub> are*

422 coloured in green. The tilted rectangles in pore 2 of both Tyr561Phe and Tyr561Ala mutants  
423 indicate the location plane for residues Ile172, Phe269, and Thr520 (pink) that comprise part  
424 of the hydrophobic gate.

425 *B,F.* Residues Ile172, Phe269, Thr520, Thr522, and Tyr561Phe (B) or Tyr561Ala (F) create a  
426 hydrophobic gate. Magnification of the planes delimited by black rectangles in A and E are  
427 rotated 90° to show the hydrophobic gate. The distances between residues connected by  
428 yellow dashed lines were measured to determine the size of the hydrophobic gate in  
429 Tyr561Phe (B) and Tyr561Ala (F) mutant channels.

430 *D,H.* Distances between residues of the hydrophobic gates in WT, Tyr561Phe, and Tyr561Ala  
431 channels as a function of the simulation time. Distances were measured diagonally between  
432 two pairs of residues: Phe269-Tyr561 and Thr520-Ile172 in WT, Phe269-Tyr561Phe and  
433 Thr520-Ile172 in the Tyr561Phe mutant (D) and between Phe269-Tyr561Ala and Thr520-  
434 Ile172 in the Tyr561Ala mutant (H). Measurements made at -500mV.

435 *C,G.* Average pore radius along canonical and alternative pores in WT and Tyr561Phe (C) and  
436 Tyr561Ala (G) mutants. The radius of both pores was measured and plotted for each  
437 channel. Canonical pores: 1 = black and dark green, 2 = dark orange; alternative pores: 1 =  
438 light green, 2 = light orange. The radius was measured at 0 mV during 30 ns every 1 ns. Note  
439 that the alternative pore is located after Glu<sub>gate</sub>, between 0 and -25 Å.

440 We speculate that protonation of CLC-2 Glu<sub>gate</sub> by intracellular H<sup>+</sup> is prevented (Sánchez-  
441 Rodríguez et al., 2012) by the hydrophobic gate that precludes pore bifurcation in WT CLC-2. To  
442 verify this we studied voltage-dependent activation at different intracellular pH (7.3, 5.5, and

443 4.3) in Tyr561Phe and Tyr561Ala mutants that have partially and fully bifurcated pores. Fig. 8  
444 shows that both mutants were readily accessible to intracellular  $H^+$ . Tyr561Ala channels show  
445 larger currents at positive potentials than Tyr561Phe channels upon intracellular acidification  
446 (Figs. 8A and 8B). Relative to  $pH_i$  5.5 the voltage dependence ( $V_{0.5}$ ) of Tyr561Phe  $P_A$  (Fig 8A) at  
447  $pH_i$  4.3 was reduced by 20 mV, whereas  $V_{0.5}$  for Tyr561Ala (Fig. 8B) was reduced by 7 mV (Table  
448 1). Notably, in Tyr561Ala the effects were readily measured at  $pH_i$  5.5 and  $P_A$  increased from 0.2  
449 to nearly 0.6 after decreasing  $pH_i$  from 7.3 to 4.3 (Fig. 8B). Similar effects were observed in the  
450 voltage dependence of  $Glu_{gate}$  in mutants Tyr561Phe and Tyr561Ala (Figs. 8A and 8B). At  $pH_i$  4.3,  
451  $Glu_{gate}$  of Tyr561Phe showed a reopening pattern at positive voltages whereas  $Glu_{gate}$  of  
452 Tyr561Ala showed stronger activation at  $pH_i$  5.5 and 4.3. At  $pH_i$  4.3,  $P_{Glu_{gate}}$  reached a minimum  
453 value of about 0.7 indicating that  $Glu_{gate}$  remains nearly always open at this  $pH_i$ . Despite the  
454 reopening at positive voltages induced by intracellular  $H^+$ , the  $V_{0.5}$  of  $P_{Glu_{gate}}$  was slightly altered  
455 in both mutants at negative potentials (Table 1). Intracellular acidification also changed the  
456 magnitude and voltage dependence of  $P_C$ . The  $V_{0.5}$  value for Tyr561Phe was shifted by -42 mV at  
457  $pH_i$  4.3 relative to  $pH_i$  5.5, and by -10 mV for Tyr561Ala (Table 1).



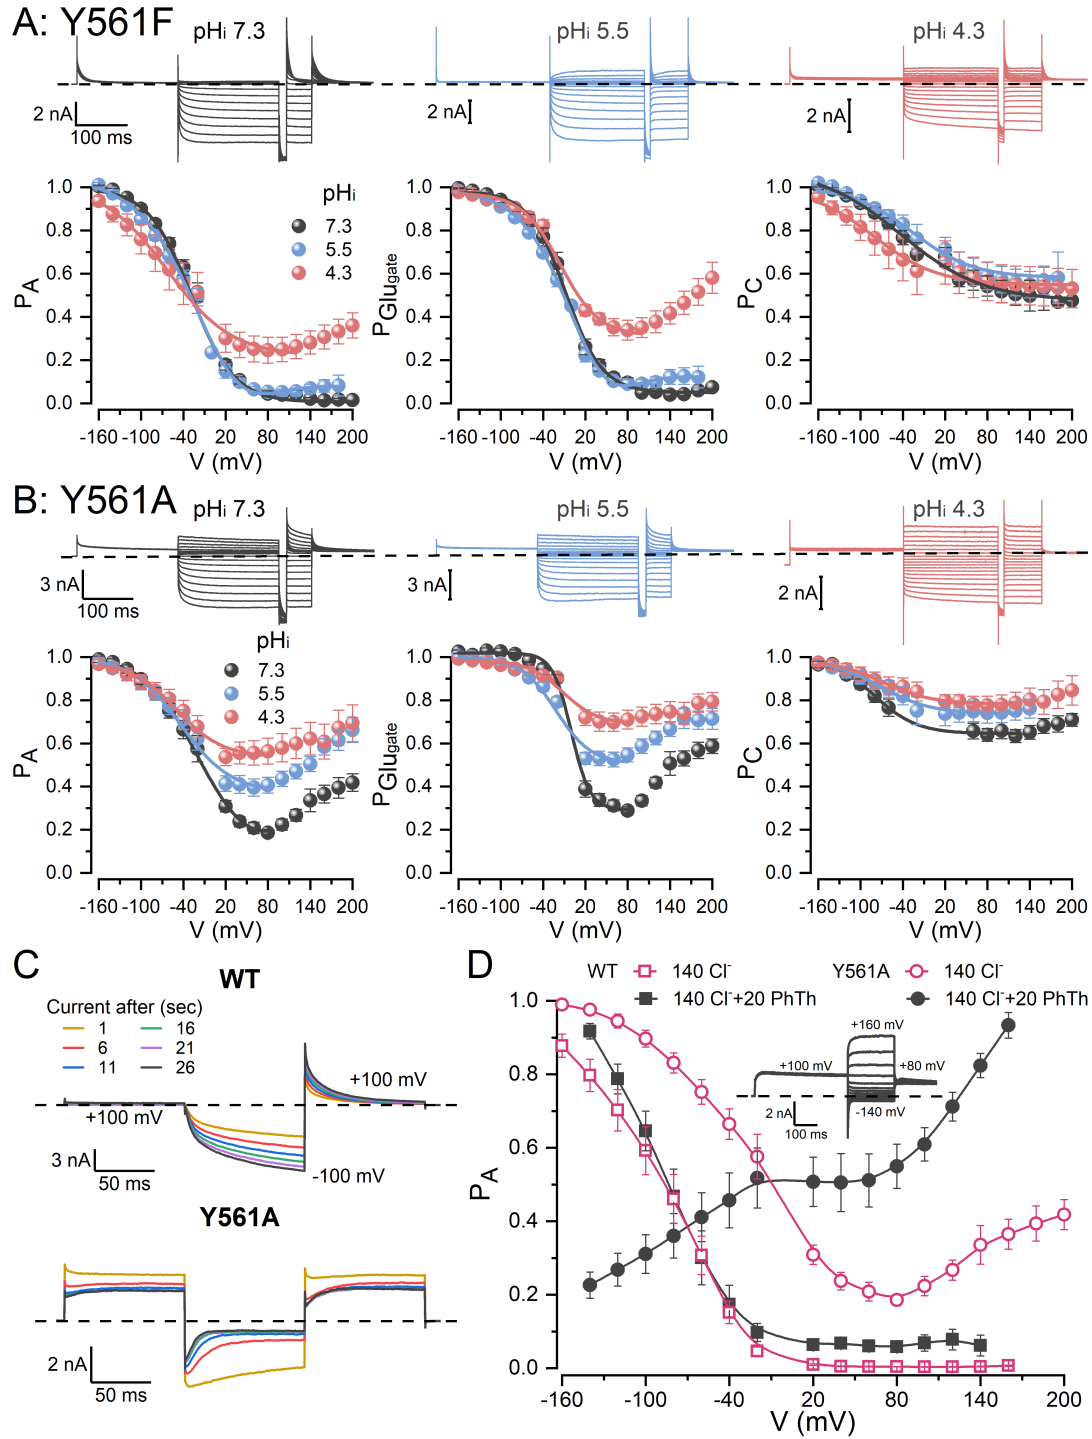

458

459 **Fig. 8 Unrestrained  $Glu_{gate}$  renders CLC-2 sensitive to intracellular protons and phthalate.**



460 A,B. Top panels.  $Cl^-$  currents from 3 different HEK293 cells expressing the Tyr561Phe (A) or  
461 Tyr561Ala (B) mutants were recorded in the presence of 140 mM intracellular  $Cl^-$  and  
462 intracellular pH 7.3 (grey), 5.5 (blue), 4.3 (red). The voltage protocol showed in Fig. 4A was  
463 utilized in these experiments. Extracellular pH and  $[Cl^-]_o$  were 7.3 and 140 mM, respectively.

464 A,B. Bottom panels. Voltage dependence of  $P_A$ ,  $P_{GluGate}$  and  $P_C$  for Tyr561Phe (A) and  
465 Tyr561Ala (B) are plotted using data collected at  $pH_i$  7.3 (grey), 5.5 (blue) and 4.3 (red). Lines  
466 are fits of the data with the Boltzmann equation used to calculate  $V_{0.5}$  and  $z$  parameters  
467 listed in Table 1.

468 C. 20 mM phthalate increases the whole cell current in WT CLC-2 (top panel) but inhibits the  
469 current in the Tyr561Ala (bottom panel) mutant channel. Whole cell currents were measured  
470 every 5 s after breaking the seal to get a pseudo-basal current.

471 D The inward rectification displayed by the WT and Tyr561Ala channels is inverted by  
472 phthalate in the Tyr561Ala channel. Comparison of the voltage-dependent activation curves  
473 determined for WT (squares) and Tyr561Ala (circles) in the absence (open) and presence  
474 (filled) of 20 mM phthalate. Phthalate was present in the intracellular solution. The inset  
475 shows whole cell recording from a cell expressing Tyr561Ala that was dialyzed with 20 mM  
476 phthalate.

477 Further evidence of a functional alternative pore was obtained by evaluating the effect of 20  
478 mM phthalic acid at pH 7.3 applied to the intracellular side of WT and Tyr561Ala channels.  
479 Figure 8C shows that WT CLC-2 was not blocked by phthalic acid but Tyr561Ala mutant channels  
480 were. WT CLC-2 showed typical inwardly rectifying kinetics and the current increased during 26

481 s of recording. In contrast, the current through Tyr561Ala mutant was blocked as soon as the  
482 membrane was hyperpolarized and then unblocked at depolarized potential (Fig. 8C, lower  
483 panel). The voltage-dependent blockade by phthalate inverted the current rectification  
484 observed in Tyr561Ala (Insert in Fig. 8D). The current saturated at negative voltages and  
485 increased at a positive potential. Fig. 8D summarizes the voltage dependence of WT (squares)  
486 and Tyr561Ala (circles) channels in the absence (empty symbols) and presence (filled symbols)  
487 of 20 mM phthalic acid in the cytosolic side. Taken together, the structural data and the effects  
488 of intracellular H<sup>+</sup> and phthalate on WT and Tyr561Ala channels, indicate that the alternative  
489 pathway is not connected to the canonical pore in WT CLC-2 but it is connected in the Tyr561Ala  
490 channel. These results explain the lack of protonation by intracellular H<sup>+</sup> in WT CLC-2 channels.

## 491 DISCUSSION

492 ***The canonical pore stays closed by Tyr561-H<sub>2</sub>O-Glu<sub>gate</sub> and is opened by electro-steric***  
493 ***repulsion.***

494 The general features of the CLC proteins (TMD containing two pores, C-terminus with CB  
495 domains, and a curvilinear pore with a narrow constriction at Glu<sub>gate</sub> location) are conserved in  
496 the equilibrated CLC-2 homology structure. However, there are important differences in specific  
497 regions associated with key functions. In CLC-2, Glu<sub>gate</sub> is slightly bent towards the intracellular  
498 side making contact with Tyr561 via one H<sub>2</sub>O molecule, a conformation apt for electro-steric  
499 repulsion with anions occupying the pore. This conformation of Glu<sub>gate</sub> is analogous to that in  
500 the EcCLC and CmCLC Cl<sup>-</sup>/H<sup>+</sup> exchangers but is different from the CLC-1 channel where Glu<sub>gate</sub> is  
501 oriented off the pore lumen. At depolarized voltages, the pore of CLC-2 is a single empty

502 pathway closed by Tyr561-H<sub>2</sub>O-Glu<sub>gate</sub> whereas the pore of CLC-1 is an open bifurcated pathway  
503 occupied by two Cl<sup>-</sup> ions(Park and MacKinnon, 2018). At hyperpolarized voltages, CLC-2  
504 becomes open and occupied by two Cl<sup>-</sup> ions. The closed/empty and open/occupied  
505 configurations at positive and negative voltages, respectively, correspond with CLC-2 function.  
506 Importantly, the canonical pores in CLC exchangers and CLC-1 channel are bifurcated but not in  
507 CLC-2 channel. In CLC Cl<sup>-</sup>/H<sup>+</sup> exchangers, the alternative cavity includes Glu203 that is critical for  
508 Glu<sub>gate</sub> protonation(Accardi et al., 2005), in CLC channels this residue is replaced by valine. In  
509 contrast, the pore of CLC-2 is isolated from the alternative cavity by hydrophobic residues that  
510 make a square-shaped hydrophobic gate. When we disrupted the hydrophobic gate, the pore  
511 became bifurcated and sensitive to intracellular H<sup>+</sup>. We propose that a non-bifurcated pore or  
512 the absence of Glu residue or both explains why CLC-2 is insensitive to intracellular H<sup>+</sup>. Tyr561  
513 successfully shields CLC-2 from intracellular H<sup>+</sup>.

514 Our data revealed that a two-leaf gate formed by the ionic interaction of Glu<sub>gate</sub> with the -OH  
515 group of Tyr561 mediated by one polarized water molecule, works to close the canonical pore  
516 of CLC-2. Tyr561 is stiff and remains motionless during the entire gating process. Instead, Glu<sub>gate</sub>  
517 is bound to Tyr561 in empty pores held at positive voltages but is released by Cl<sup>-</sup> during  
518 activation. Free Glu<sub>gate</sub> moves outwardly or inwardly depending on the electro-steric repulsive  
519 force generated by the Cl<sup>-</sup> flux. Accordingly, mutating Tyr561 or Glu<sub>gate</sub> leads to partially open  
520 (Tyr561Phe, Glu213Asp) or fully open (Tyr561Ala, Glu213A/V) phenotypes(De Santiago et al.,  
521 2005; Niemeyer et al., 2003). We conclude that CLC-2 Glu<sub>gate</sub> operates as a one-way check valve

522 similar to what has been proposed for K2P potassium channels(Schewe et al., 2016) and that  
523 Tyr561 prevents Glu<sub>gate</sub> from opening in the inward direction.

524 **Activation is possible by coupling gating to permeation.**

525 Cl<sup>-</sup> permeation was coupled to gating and lasted 580 ns (see video). During this time lapse,  
526 activation took place in five steps: the occupation of the pore by intracellular Cl<sup>-</sup>, repulsion of  
527 Glu<sub>gate</sub> by Cl<sup>-</sup>, protonation of Glu<sub>gate</sub>, double occupancy of the pore, and Cl<sup>-</sup> exit (Fig. 9). During  
528 activation, major structural rearrangements occurred at the intracellular side, the gate and the  
529 extracellular side. At the intracellular side, loading and emptying S<sub>i</sub> trigger a rapid interaction  
530 (8.3 ns) between the side chains of Lys568 and Glu174, similar to the opening/closing of a crab  
531 claw. At the extracellular side, a protonated Glu<sub>gate</sub> stays far from Lys212, which allows the  
532 straightening and counter-clockwise bent of Lys212. This remarkably structural rearrangement  
533 allows Cl<sup>-</sup> to interact with the Lys212 side chain during the exit process.

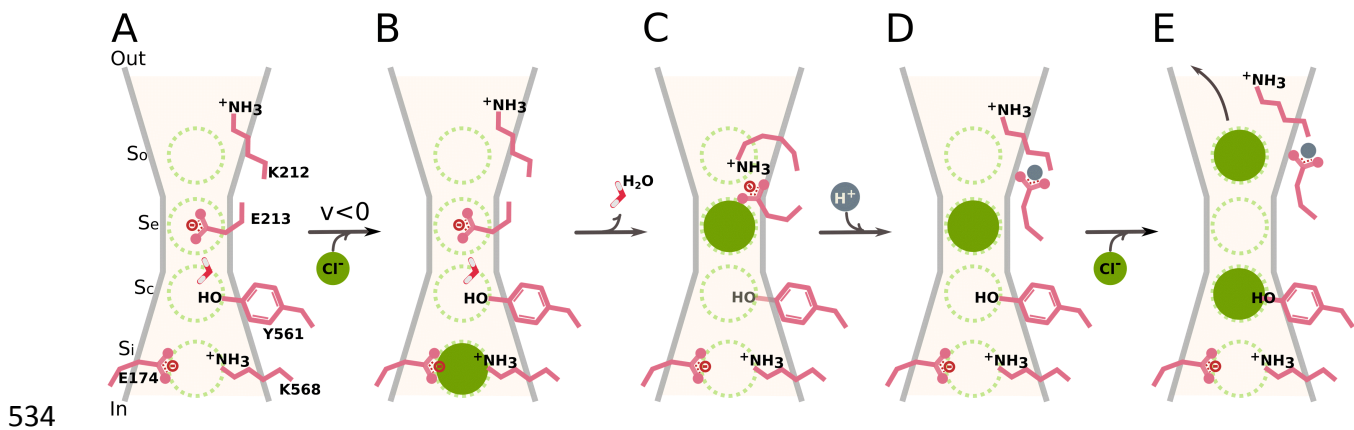

535 **Fig. 9 Schematic representation of the electro-steric activation mechanism for CLC-2.**

536 The Scheme depicts one pore, four anion-binding sites (S<sub>i</sub>, S<sub>c</sub>, S<sub>e</sub>, and S<sub>o</sub>), and the side chains of  
537 critical residues (Glu174, Lys568, Tyr561, Glu213, and Lys212) lining the pore. Regardless of

538 *voltage, the empty pore remains closed by the gate Tyr561-H<sub>2</sub>O-Glu<sub>gate</sub> (A). Upon a*  
539 *hyperpolarization ( $V < 0$ ), one intracellular Cl<sup>-</sup> occupies S<sub>i</sub> marking the beginning of the activation*  
540 *process (B). The gate is split by electro-steric repulsion when Cl<sup>-</sup> moves forward into the*  
541 *permeation pathway and sits on S<sub>c</sub> and S<sub>e</sub> thus coupling permeation to gating (C). Then, Glu<sub>gate</sub>*  
542 *adopts an outward-facing conformation and interacts with Lys212, this conformation is*  
543 *suggestive of a pre-open state (D). The Glu<sub>gate</sub>-Lys212 salt-bridge is broken by protonation*  
544 *allowing an outward straightening of the Lys212 side chain. Finally, Cl<sup>-</sup> exits the pore when*  
545 *another intracellular Cl<sup>-</sup> occupies S<sub>i</sub> and S<sub>c</sub> (E). A doubly occupied pore indicates that the pore is*  
546 *fully open and conductive.*

547 Despite that, the loaded Lys212 side chain was near to extracellular media, the Cl<sup>-</sup> does not  
548 readily escape because it sits in a deep well. For Cl<sup>-</sup> to leave Lys212 another Cl<sup>-</sup> ion needs to  
549 occupy S<sub>i</sub>. The doubly occupied pore condition (for 100 ns) is critical for initiating and  
550 maintaining anion conduction (Fig. 9, video). A recent computational analysis aimed at  
551 predicting intrinsic or extrinsic elements of a protein that could respond to changes in the local  
552 electric field indicated that either Glu<sub>gate</sub> or a Cl<sup>-</sup> ion trapped in the pore could participate in  
553 voltage sensing in CLC-1(Kasimova et al., 2018). According to our simulations, Glu<sub>gate</sub> moved  
554 outwardly ~7 Å from its original closed position but remained interacting with Lys212 until it  
555 was protonated. A protonated Glu<sub>gate</sub> do not contribute to voltage sensing. Instead, is the  
556 negatively charged permeant Cl<sup>-</sup> ion that goes across the entire electrical field that provides the  
557 gating charge in CLC-2.

558 The gating mechanism proposed here differs substantially from the mechanism recently  
559 suggested by McKiernan et al,(McKiernan et al., 2020). These authors combined Markov state  
560 modelling with MD simulations and a homology structure of rat CLC-2 built using the CmCLC Cl<sup>-</sup>  
561 /H<sup>+</sup> exchanger structure 3ORG as a template(Feng et al., 2010). They propose that entry of  
562 intracellular Cl<sup>-</sup> requires rotation of the Ser168-Gly169-Ile170 backbone and opening of Glu<sub>gate</sub>  
563 follows this in a Cl<sup>-</sup>-dependent manner. However, our results show that Lys568 and Glu174 are  
564 necessary for pore occupation by intracellular Cl<sup>-</sup>. Another discrepancy is the role of Tyr561.  
565 McKiernan's work suggests that Tyr561 (Tyr559 in their homology structure) is irrelevant for  
566 CLC-2 gating, an idea supported by the lack of effect on single-channel conductance after  
567 mutating Tyr in CLC-0 and CLC-1 channels(Accardi and Pusch, 2003; Estévez et al., 2003; Ludewig  
568 et al., 1996). We observed that Glu<sub>gate</sub> and Tyr561 remained in the same position regardless of  
569 voltage in empty pores. But, when a pore became occupied at a negative potential, Cl<sup>-</sup> rapidly  
570 reconfigured the Tyr561-H<sub>2</sub>O-Glu<sub>gate</sub> array without disturbing Tyr561. These observations would  
571 suggest that Tyr561 does not play a role in gating. However, our MD simulations and  
572 electrophysiological data demonstrate that Tyr561 holds Glu<sub>gate</sub> in the closed position and keeps  
573 intracellular protons from entering the pore. A limitation of McKiernan's data is that only one  
574 subunit was analysed at 0 mV, under these conditions the coupling of fast (Glu<sub>gate</sub>) and common  
575 gates and the observation of gating transitions is limited because the open probability is almost  
576 null.

577 Is an electro-steric activation mechanism unique to CLC-2? We do not think so because voltage-  
578 dependent gating in CLC-0 and CLC-1 shows AMF behaviour, permeant anions facilitate gating,

579 and non-permeant anions support voltage-dependent gating of CLC-1(Chen, 2003; Chen and  
580 Miller, 1996; Pusch et al., 1995; Rychkov et al., 2001, 1998). However, pore bifurcation could be  
581 key in fine-tuning activation. Protonation of Glu<sub>gate</sub> in the bifurcated pores of CLC-1 and CLC-0  
582 could be facilitated *after* Glu<sub>gate</sub> interacts with the permeant anions. Thus, it is likely that a  
583 mechanism entailing electro-steric gating is present in all CLC Cl<sup>-</sup> channels. In addition to CLC Cl<sup>-</sup>  
584 channels, the K2P K<sup>+</sup> channels that lack a voltage sensor domain also display voltage  
585 dependence due to the movement of K<sup>+</sup> ions along the pore(Kopec et al., 2019; Schewe et al.,  
586 2016). Similarly, the voltage-dependent gating of viral K<sup>+</sup> channel Kcv<sub>NTS</sub> could rely on  
587 occupation by K<sup>+</sup> of an external site(Rauh et al., 2018). Interestingly, the outward movement of  
588 ions could explain the activation of PIEZO channels by voltage alone(Moroni et al., 2018). Thus,  
589 coupling ion permeation to pore gating through electro-steric repulsion might be a more  
590 general activation mechanism than previously estimated(Hilgemann, 2020).

## 591 **MATERIALS AND METHODS**

### 592 ***Homology model of mouse CLC-2 and preparation of membrane-protein ensembles.***

593 Initially, we constructed a model for the structure of the mouse CLC-2 Cl<sup>-</sup> channel (908 aa) using  
594 the I-Tasser(Roy et al., 2010) server (<https://zhanglab.ccmb.med.umich.edu/I-TASSER/>) and the  
595 bovine CLC-K structure (5TQQ; Uniprot: E1B792; 687 aa) solved at 3.76 Å resolution using Cryo-  
596 EM(Park et al., 2017). This model structure was named CLC-2<sup>CLC-K</sup>. mCLC-2 is 45.7% identical to  
597 CLC-K within the transmembrane region. However, the pores of mCLC-2 and CLC-K differ in two  
598 residues; valine replaces Glu<sub>gate</sub> in CLC-K. We built an additional model using as template the  
599 hCLC-1 structure determined by Cryo-EM (6COY; UniProt: P35523; 988 aa)(Park and MacKinnon,

600 2018) and the Modeller v9.19 software(Sali and Blundell, 1993). This model was named CLC-2<sup>CLC-</sup>  
601 <sup>1</sup>. The available hCLC-1 structure is based on 626 residues visible in the density maps. hCLC-1, a  
602 988 residues long protein, was solved at 3.36 Å. CLC-2 and hCLC-1 are 56% identical within the  
603 transmembrane region and within the pore region, they differed by one amino acid. We  
604 measured the pore radius using CAVER 3.0(Chovancova et al., 2012).

605 The protonation state of ionisable residues at pH 7.3 was determined by PROPKA(Olsson et al.,  
606 2011). The protein, oriented using the Positioning of Proteins in Membrane server (PPM,  
607 <http://opm.phar.umich.edu/server.php>), was embedded in symmetric lipid bilayers of 1,2-  
608 dimyristoyl-sn-glycerol-3-phosphocholine (DMPC, CLC-2<sup>CLC-K</sup>) or 1-palmitoyl-2-oleoyl-sn-glycerol-  
609 3-phosphocholine (POPC, CLC-2<sup>CLC-1</sup>) generated using CHARMM-GUI(Jo et al., 2008) membrane  
610 builder (<http://www.charmm-gui.org>). The structures were solvated with water modelled by  
611 TIP3(Jorgensen et al., 1983) and 140 mM NaCl. Before MD simulation, the CLC-2<sup>CLC-K</sup> and CLC-  
612 2<sup>CLC-1</sup> systems consisted of 785 DMPC, 102741 TIP3, 800 Na<sup>+</sup> and 416 Cl<sup>-</sup> contained in a 170 X  
613 170 X 158 Å<sup>3</sup> simulation box, and of 554 POPC, 43283 TIP3, 110 Na<sup>+</sup>, and 130 Cl<sup>-</sup> contained in a  
614 176 X 171 X 100 Å<sup>3</sup> box, respectively. Structures of Tyr561Phe and Tyr561Ala mutants were built  
615 on CLC-2<sup>CLC-1</sup> using PyMol. Simulation boxes consisted of 554 POPC, 43271 TIP3, 111 Na<sup>+</sup>, and  
616 131 Cl<sup>-</sup> in a 170 X 167 X 102 Å<sup>3</sup> box, and of 555 POPC, 43325 TIP3, 110 Na<sup>+</sup>, and 130 Cl<sup>-</sup> in a 170  
617 X 165 X 102 Å<sup>3</sup> box for Tyr561Phe and Tyr561Ala, respectively.

### 618 ***Molecular dynamics simulations.***

619 MD simulations were performed with the GPU-accelerated Gromacs 5.1 package(Berendsen et  
620 al., 1995) using the CHARMM36 force field(Klauda et al., 2010). The equations of motion were



621 solved using the leapfrog algorithm with a time step of 2fs. The temperature was coupled to the  
622 Nosé–Hoover thermostat with a parameter  $\tau_T = 0.2$  ps at 300 K while the pressure was coupled  
623 to the Parrinello–Rahman barostat(Parrinello and Rahman, 1981) with a coupling parameter  $\tau_P =$   
624 0.5 ps at 1 atm. Bond distances were kept rigid by using the LINCS algorithm. The electrostatic  
625 interactions were computed with the particle mesh Ewald (PME) approach(Darden et al., 1993)  
626 with a tolerance of  $10^{-6}$  for the real space contribution, with a grid spacing of 1.2 Å, spline  
627 interpolation of order 4. In the isotropic NPT simulations, the real part of the Ewald summation  
628 and the LJ interactions were truncated at 12 Å and 10 Å, respectively. Long-range corrections for  
629 the LJ energy and pressure were included. All ensembles were minimized and equilibrated  
630 during 100 and 30 ns (WT and mutants), before implementing a potential difference across the  
631 membrane using the CompEI or the electric field protocols, respectively.

632 To perform CompEI we duplicated the CLC-2<sup>CLC-K</sup> ensemble in the z-direction. Our CompEI  
633 simulation box consisted of three compartments separated by two DMPC bilayers embedding  
634 one CLC-2<sup>CLC-K</sup> molecule each and solvated with 140 mM NaCl. Considering that charge ( $\Delta q$ ),  
635 membrane capacitance ( $C_m \sim 1 \mu\text{F}/\text{cm}^2$ ), and membrane voltage (V) are related by the equation  
636  $V = \Delta q / C_m$ , we unbalanced the charge between compartments by moving  $\text{Na}^+$  ions to generate a  
637 voltage gradient across the membranes(Kutzner et al., 2011). A difference of 2 or 20  $\text{Na}^+$  ions  
638 between central and side compartments is equivalent to apply +94 or +940 mV and -94 or -940  
639 mV to the intracellular sides of  $^+\text{CLC-2}^{\text{CLC-K}}$  (channel 1 inserted in bilayer 1) and of  $^-\text{CLC-2}^{\text{CLC-K}}$   
640 (channel 2 inserted in bilayer 2), respectively. This condition allowed us to analyse the CLC-2  
641 closed state (positive voltages) and the open state (negative voltages) in the same MD

642 simulation. Additionally, we applied a uniform electric field of -500 mV perpendicular to the  
643 membrane (+z direction is from intracellular to extracellular side),  $E_z$ . The last 200 ns of the MD  
644 simulation of WT CLC-2<sup>CLC-K</sup> ( $E_z = V/L = -3.16 \text{ mV}/\text{\AA}$ , where V is the voltage and L is the size to the  
645 box on z-direction) and on Tyr561Phe or Tyr561Ala mutants ( $E_z = -4.9 \text{ mV}/\text{\AA}$  for both) was ran  
646 using this protocol. A protonated  $\text{CLC-2}^{\text{CLC-K}}$  molecule was inserted in a DMPC bilayer and  
647 solvated with 140 mM NaCl. Thus, our hybrid protocol for MD simulation consisted of 480 ns  
648 CompEI (144 ns at  $\pm 94 \text{ mV}$  followed by 340 ns at  $\pm 940 \text{ mV}$ ), protonation of  $\text{CLC-2}^{\text{CLC-K}}$  Glu<sub>gate</sub>, and  
649 of 200 ns applying an electric field of -500 mV to preserve the stability of the system. The  
650 protonation of Glu<sub>gate</sub> (Glu213<sup>H+</sup>, Fig. 3) was carried out using CHARMM-GUI and equilibrated for  
651 10 ns before applying an electrical field.

652 Gromacs tools, VMD and PyMol were used for analysis and visualization.

### 653 ***Poisson-Boltzmann calculation***

654 CLC-2<sup>CLC-K</sup> in open and closed states was extracted at 565 ns from MD simulation. By solving the  
655 linearized Poisson-Boltzmann equation in CHARMM-GUI PBED solver (Im et al., 1998), the  
656 average electrostatic potential (EP) along the pore, identified by CAVER 3.0, was calculated on a  
657  $99 \times 97 \times 79 \text{ \AA}^3$  (1  $\text{\AA}$  grid spacing), with the CHARMM36 force field. The average potential was  
658 calculated on the transversal area determined by the pore radius. The dielectric constant for  
659 protein was 1, for membrane and membrane head group was 2, and for solvent containing 150  
660 mM salt concentration was 80. The thickness of the membrane was 35  $\text{\AA}$ . *In silico* mutants were  
661 generated with CHARMM-GUI tools.

662 ***Cell culture, transient expression and electrophysiological recordings***

663 HEK-293 cells transfected with WT mouse CLC-2, mouse Tyr561Phe or mouse Tyr561Ala cDNAs  
664 were cultured and used for recording whole cell Cl<sup>-</sup> currents (I<sub>Cl</sub>) as previously described(De  
665 Jesús-Pérez et al., 2016; De Santiago et al., 2005; Sánchez-Rodríguez et al., 2012, 2010). Control  
666 solutions used to record I<sub>Cl</sub> contained (in mM): TEA-Cl 139, CaCl<sub>2</sub> 0.5, HEPES 20 and D-mannitol  
667 100 (external); and TEA-Cl 140, HEPES 20 and EGTA 20 (internal). HEPES was substituted by MES  
668 or phthalic acid to prepare solutions with low pH. The pH of these solutions was adjusted to 7.3  
669 with TEA-OH. Average tonicity of external and internal solutions was 387.9±1.9 and 347.3±2.6  
670 mosm/kg, respectively.

671 The mouse CLC-2 DNA inserted in the pGEM<sup>®</sup>-T vector was used for the heterologous  
672 expression in *Xenopus laevis* oocytes. The DNA was amplified, linearized with the Pme I enzyme  
673 (New England Biolabs, Inc., Ipswich, MA, USA) and transcribed in vitro using the T7 promoter  
674 mMESSAGE cRNA kit (Ambion, Austin, TX., USA). All mutations in this study were performed  
675 using standard PCR techniques and confirmed by sequencing the entire cassettes.

676 Procedures and methods involving *Xenopus laevis* frogs followed relevant guidelines and  
677 regulations as previously described(Rodríguez-Rangel et al., 2020). Briefly, oocytes contained in  
678 1-3 mL of ovary lobes extracted via survival surgery were isolated by enzymatic digestion with  
679 collagenase type II (Worthington Biochemical Corp., NJ, USA) under mechanical agitation. After  
680 the isolation, each oocyte was injected with 40 ng of RNA encoding the WT mCLC-2 or mutants;  
681 oocytes were incubated for 2-7 days at 17 °C in a standard oocyte saline solution containing (in  
682 mM): 100 NaCl, 1 MgCl<sub>2</sub>, 10 HEPES, 2 KCl and 1.8 CaCl<sub>2</sub> with 50 µg/mL gentamycin at pH 7.5. All

683 chemical compounds utilized for this study were purchased from Sigma-Aldrich (Sigma-Aldrich  
684 Co., St. Louis, MO, USA).

685  $I_{Cl}$  from HEK cells was recorded using a protocol that consisted of holding the cell at 0 mV, then  
686 applying a voltage between +60 or +200 to -200 mV in 20 mV steps and then returning the cell  
687 to +60 or +80 mV. All experiments were performed at room temperature (21-23°C). To  
688 determine the effect of AMF on ClC-2 activation, we used internal solutions containing 0.0, 0.25,  
689 0.5, 0.75, and 1.0 acetate mole fractions.  $I_{Cl}$  was recorded using pClamp 10 and sampling at 500  
690 kHz. Otherwise, currents were sampled using pClamp V8. To avoid electrode polarization while  
691 using internal solutions with low  $Cl^-$  we used an electrode embedded in a 3 M KCl/3% agar  
692 jacket(Shao and Feldman, 2007). Membrane and reversal potentials were corrected off-line  
693 using liquid junction potentials experimentally measured(Neher, 1992).

694 Electrophysiology measurements in *Xenopus laevis* oocytes were conducted using the cut-open  
695 oocyte voltage clamp methodology(Siefani and Bezanilla, 1998). The internal recording solution  
696 contained (in mM): 136 NMDG (N-methyl-D-glucamine)-HCl, 2  $MgCl_2$ , 10 EGTA, 10 HEPES. The  
697 external recording solution was composed (in mM) by 130 NMDG-HCl, 4  $MgCl_2$ , 1  $BaCl_2$  and 10  
698 HEPES. Both solutions were adjusted to pH 7.3 with 1M NMDG.  $I_{Cl}$  was amplified and digitized  
699 using the Oocyte Clamp Amplifier CA-1A (Dagan Corporation, Minneapolis, MN, USA) and the  
700 USB-1604-HS-2AO Multifunction Card (Measurement Computing, Norton, MA, USA). The  
701 acquisition system was controlled by the GpatchMC64 program (Department of Anesthesiology,  
702 UCLA, Los Angeles, CA, USA) via a personal computer. Recordings sampled at 100 kHz and  
703 filtered at 10 kHz were obtained at room temperature (21–23 °C).

704 **Analysis**

705 The voltage dependence of the open probability ( $P_A$ ) was determined by constructing curves of  
706  $P_A (=G/G_{max})$  versus voltage ( $P_A(V)$ ). Conductance ( $G$ ) at each  $V$  was calculated as  $I_{Cl}/(V-V_r)$ ,  
707 where  $V$  is the membrane potential and  $V_r$  is the reversal potential. The maximum conductance  
708 ( $G_{max}$ ) was estimated before normalization by fitting the  $G$  against  $V$  curves with the Boltzmann  
709 equation:

710 
$$\frac{G}{G_{max}} = \frac{1}{1 + e^{-\frac{zF}{RT}(V - V_{0.5})}}$$
 Equation 1

711 where  $z$  is the apparent charge,  $F$  is the Faraday constant,  $R$  is the gas constant,  $T$  is the  
712 temperature and  $V_{0.5}$  is the  $V$  needed to reach  $P_A = 1/2$ . Instantaneous current-voltage plots  
713 were constructed using the magnitude of tail currents recorded at different  $V$  and fitted to a  
714 linear function to determine  $V_r$ .

715 The voltage-dependence of the open probability of  $Gl_{u_{gate}}$  ( $P_{GluGate}$ ) and common ( $P_C$ ) gates was  
716 calculated as described before (De Santiago et al., 2005). Briefly, we used a 15 ms  
717 hyperpolarization pulse to -200 mV to completely open  $Gl_{u_{gate}}$  (time constant  $\leq 3$ ms) so  $P_{GluGate}$   
718  $\sim 1$ . When  $I_{Cl}$  reaches steady-state  $P_A = P_{GluGate} * P_C$ , before the hyperpolarization step to -200 mV  
719  $I_{Cl}$  obeys the relationship  $I_o = 2NiP_{GluGate} * P_C$ , and after the hyperpolarization step  $I_{Cl}$  is given by  
720  $I_{ahs} \approx 2NiP_C$ . Here,  $N$  is the total number of channels,  $i$  is the single-channel current, all multiplied  
721 by 2 because is a two-pore channel. Hence,  $P_{GluGate}$  can be calculated as  $I_o/I_{ahs}$  and  $P_C = P_A/P_{GluGate}$ .  
722 Cut open voltage-clamp recordings were included in the analysis after determining that the  
723 reversal potential values of  $I_{Cl}$  were near the predicted Nernst potential for  $Cl^-$ .  $I_{Cl}$  recordings

724 were analysed with the software Analysis (Department of Anesthesiology, UCLA, Los Angeles,  
725 CA, USA).

726 Figures and fits were carried out using Origin (Origin Lab, Northampton, MA). Experimental data  
727 are plotted as mean  $\pm$  SEM of n (number of independent experiments). Dashed black lines in  
728 each Figure indicate  $I_{Cl} = 0$ . Where necessary, a paired Student t-test was used to evaluate  
729 significant differences at  $P < 0.05$  between data sets.

### 730 **ACKNOWLEDGEMENTS**

731 The authors thank Dr Patricia Perez-Cornejo for critical comments, Carmen Y. Hernandez-  
732 Carballo for technical assistance. The work was supported by grants 219949 and FC-2016-01-  
733 1955 from CONACyT, Mexico. RG-G is a recipient of a Graduate Student Fellowship #726278  
734 from CONACyT, Mexico. JJDeJ-P was supported by a Graduate Student Fellowship and  
735 Postdoctoral Fellowship 234820 and 711128 from CONACyT, Mexico, respectively.

### 736 **AUTHOR CONTRIBUTIONS**

737 JJDeJP                      Designed research, performed patch-clamp experiments, performed MD  
738                                      simulations, analysed data and wrote the manuscript.

739 VDRJ                         Performed patch-clamp experiments, analysed data and review the  
740                                      manuscript.

741 ILGH                         Performed patch-clamp experiments

742 GAMM                         Performed MD simulations and analysed the data

743 JESR, RG-G Performed electrophysiological experiments in X. oocytes, analysed the  
744 data and wrote the manuscript.

745 JA Designed research, analysed data, wrote the paper, and secure funds.

746 **COMPETING INTEREST**

747 The authors declare no competing interests

748 **REFERENCES**

749 Accardi A, Pusch M. 2003. Conformational changes in the pore of CLC-0. *J Gen Physiol* **122**:277–  
750 293. doi:10.1085/jgp.200308834

751 Accardi A, Walden M, Nguitragool W, Jayaram H, Williams C, Miller C. 2005. Separate Ion  
752 Pathways in a Cl<sup>-</sup>/H<sup>+</sup> Exchanger. *J Gen Physiol* **126**:563–570. doi:10.1085/jgp.200509417

753 Allouche A. 2012. Software News and Updates Gabedit — A Graphical User Interface for  
754 Computational Chemistry Softwares. *J Comput Chem* **32**:174–182. doi:10.1002/jcc

755 Berendsen HJC, van der Spoel D, van Drunen R. 1995. GROMACS: A message-passing parallel  
756 molecular dynamics implementation. *Comput Phys Commun* **91**:43–56. doi:10.1016/0010-  
757 4655(95)00042-E

758 Bezanilla F. 2008. How membrane proteins sense voltage. *Nat Rev Mol Cell Biol* **9**:323–332.  
759 doi:10.1038/nrm2376

760 Bezanilla F. 2002. Voltage sensor movements. *J Gen Physiol*. doi:10.1085/jgp.20028660

761 Boccaccio A, Pusch M, Boccaccio A, Pusch M. 2018. TMEM16 Ca<sup>2+</sup> Activated Cl<sup>-</sup> Channels and  
De Jesús-Pérez et al., 43 June 10, 2020

- 762 CLC Chloride Channels and TransportersThe Oxford Handbook of Neuronal Ion Channels.  
763 Oxford University Press. doi:10.1093/oxfordhb/9780190669164.013.17
- 764 Chen T-Y. 2003. Coupling gating with ion permeation in ClC channels. *Sci STKE* **2003**:pe23.  
765 doi:10.1126/stke.2003.188.pe23
- 766 Chen TY, Miller C. 1996. Nonequilibrium gating and voltage dependence of the ClC-0 Cl-  
767 channel. *J Gen Physiol* **108**:237–250. doi:10.1085/jgp.108.4.237
- 768 Chovancova E, Pavelka A, Benes P, Strnad O, Brezovsky J, Kozlikova B, Gora A, Sustr V, Klvana M,  
769 Medek P, Biedermannova L, Sochor J, Damborsky J. 2012. CAVER 3.0: A Tool for the  
770 Analysis of Transport Pathways in Dynamic Protein Structures. *PLoS Comput Biol* **8**:23–30.  
771 doi:10.1371/journal.pcbi.1002708
- 772 Cox CD, Bavi N, Martinac B. 2016. Origin of the Force: The Force-From-Lipids Principle Applied to  
773 Piezo Channels. doi:10.1016/bs.ctm.2016.09.001
- 774 Crozier PS, Henderson D, Rowley RL, Busath DD. 2001. Model channel ion currents in NaCl-  
775 extended simple point charge water solution with applied-field molecular dynamics.  
776 *Biophys J*. doi:10.1016/S0006-3495(01)75946-2
- 777 Darden T, York D, Pedersen L. 1993. Particle mesh Ewald: An N·log(N) method for Ewald sums in  
778 large systems. *J Chem Phys* **98**:10089–10092. doi:10.1063/1.464397
- 779 De Jesús-Pérez JJ, Castro-Chong A, Shieh RC, Hernández-Carballo CY, De Santiago-Castillo JA,  
780 Arreola J. 2016. Gating the glutamate gate of CLC-2 chloride channel by pore occupancy. *J*  
781 *Gen Physiol* **147**:25–37. doi:10.1085/jgp.201511424



- 782 De Santiago JA, Nehrke K, Arreola J. 2005. Quantitative analysis of the voltage-dependent gating  
783 of mouse parotid ClC-2 chloride channel. *J Gen Physiol* **126**:591–603.  
784 doi:10.1085/jgp.200509310
- 785 Dutzler R, Campbel EB, Cadene M, Chait BT, MacKinnon R. 2002. X-ray structure of a ClC  
786 chloride channel at 3.0Å reveals the molecular basis of anion selectivity. *Nature* **415**:287–  
787 294.
- 788 Dutzler R, Campbell EB, MacKinnon R. 2003. Gating the selectivity filter in ClC chloride channels.  
789 *Science* **300**:108–112. doi:10.1126/science.1082708
- 790 Estévez R, Schroeder BC, Accardi A, Jentsch TJ, Pusch M. 2003. Conservation of chloride channel  
791 structure revealed by an inhibitor binding site in ClC-1. *Neuron* **38**:47–59.  
792 doi:10.1016/S0896-6273(03)00168-5
- 793 Feng L, Campbell EB, Hsiung Y, MacKinnon R. 2010. Structure of a eukaryotic CLC transporter  
794 defines an intermediate state in the transport cycle. *Science* **330**:635–41.  
795 doi:10.1126/science.1195230
- 796 Goldschen-Ohm MP, Chanda B. 2017. SnapShot: Channel Gating Mechanisms. *Cell* **170**:594-  
797 594.e1. doi:10.1016/j.cell.2017.07.019
- 798 Hilgemann DW. 2020. Regulation of ion transport from within ion transit pathways. *J Gen*  
799 *Physiol* **152**. doi:10.1085/jgp.201912455
- 800 Hille B. 2001. Ion Channels of Excitable Membranes, Third Edit. ed. Sinauer Associates Is an  
801 Imprint of Oxford University Press.

- 802 Hille B, Armstrong CM, MacKinnon R. 1999. Ion channels: From idea to reality. *Nat Med*.  
803 doi:10.1038/13415
- 804 Im W, Beglov D, Roux B. 1998. Continuum solvation model: Computation of electrostatic forces  
805 from numerical solutions to the Poisson-Boltzmann equation. *Comput Phys Commun*.  
806 doi:10.1016/s0010-4655(98)00016-2
- 807 Jentsch TJ, Pusch M. 2018. CLC chloride channels and transporters: Structure, function,  
808 physiology, and disease. *Physiol Rev*. doi:10.1152/physrev.00047.2017
- 809 Jiang Y, Ruta V, Chen J, Lee A, Mackinnon R. 2003. The principle of gating charge movement in a  
810 voltage-dependent K<sup>+</sup> channel **423**:42–48.
- 811 Jo S, Kim T, Iyer VG, Im W. 2008. CHARMM-GUI: A web-based graphical user interface for  
812 CHARMM. *J Comput Chem*. doi:10.1002/jcc.20945
- 813 Jorgensen WL, Chandrasekhar J, Madura JD, Impey RW, Klein ML. 1983. Comparison of simple  
814 potential functions for simulating liquid water. *J Chem Phys* **79**:926–935.  
815 doi:10.1063/1.445869
- 816 Kasimova MA, Lindahl E, Delemotte L. 2018. Determining the molecular basis of voltage  
817 sensitivity in membrane proteins. *J Gen Physiol* **215**:1444–1458.  
818 doi:10.1085/jgp.201812086
- 819 Khalili-Araghi F, Tajkhorshid E, Schulten K. 2006. Dynamics of K<sup>+</sup> ion conduction through Kv1.2.  
820 *Biophys J*. doi:10.1529/biophysj.106.091926

- 821 Klauda JB, Venable RM, Freites JA, O'Connor JW, Tobias DJ, Mondragon-Ramirez C, Vorobyov I,  
822 Mackerell AD, Pastor RW. 2010. Update of the CHARMM All-Atom Additive Force Field for  
823 Lipids: Validation on Six Lipid Types. *J Phys Chem B*. doi:10.1021/jp101759q
- 824 Kopec W, Rothberg BS, de Groot BL. 2019. Molecular mechanism of a potassium channel gating  
825 through activation gate-selectivity filter coupling. *Nat Commun* **10**. doi:10.1038/s41467-  
826 019-13227-w
- 827 Kratochvil HT, Carr JK, Matulef K, Annen AW, Li H, Maj M, Ostmeyer J, Serrano AL, Raghuraman  
828 H, Moran SD, Skinner JL, Perozo E, Roux B, Valiyaveetil FI, Zanni MT. 2016. Instantaneous  
829 ion configurations in the K<sup>+</sup> ion channel selectivity filter revealed by 2D IR spectroscopy.  
830 *Science (80- )*. doi:10.1126/science.aag1447
- 831 Kutzner C, Grubmüller H, De Groot BL, Zachariae U. 2011. Computational electrophysiology: The  
832 molecular dynamics of ion channel permeation and selectivity in atomistic detail. *Biophys J*  
833 **101**:809–817. doi:10.1016/j.bpj.2011.06.010
- 834 Long SB, Campbell EB, MacKinnon R. 2005. Voltage sensor of Kv1.2: Structural basis of  
835 electromechanical coupling. *Science (80- )*. doi:10.1126/science.1116270
- 836 Ludewig U, Pusch M, Jentsch TJ. 1996. Two physically distinct pores in the dimeric ClC-0 chloride  
837 channel. *Nature*. doi:10.1038/383340a0
- 838 McKiernan KA, Koster AK, Maduke M, Pande VS. 2020. Dynamical model of the CLC-2 ion  
839 channel reveals conformational changes associated with selectivity-filter gating. *PLoS*  
840 *Comput Biol*. doi:10.1371/journal.pcbi.1007530

- 841 Miller C. 2006. ClC chloride channels viewed through a transporter lens. *Nature* **440**:484–9.  
842 doi:10.1038/nature04713
- 843 Moroni M, Servin-Vences MR, Fleischer R, Sánchez-Carranza O, Lewin GR. 2018. Voltage gating  
844 of mechanosensitive PIEZO channels. *Nat Commun* **9**. doi:10.1038/s41467-018-03502-7
- 845 Neher E. 1992. Correction for liquid junction potentials in patch clamp experiments. *Methods*  
846 *Enzymol.* doi:10.1016/0076-6879(92)07008-C
- 847 Niemeyer MI, Cid LP, Yusef YR, Briones R, Sepúlveda F V. 2009a. Voltage-dependent and -  
848 independent titration of specific residues accounts for complex gating of a ClC chloride  
849 channel by extracellular protons. *J Physiol* **587**:1387–400.  
850 doi:10.1113/jphysiol.2008.167353
- 851 Niemeyer MI, Cid LP, Yusef YR, Briones R, Sepúlveda F V. 2009b. Voltage-dependent and -  
852 independent titration of specific residues accounts for complex gating of a ClC chloride  
853 channel by extracellular protons. *J Physiol.* doi:10.1113/jphysiol.2008.167353
- 854 Niemeyer MI, Cid LP, Zúñiga L, Catalán M, Sepúlveda F V. 2003. A conserved pore-lining  
855 glutamate as a voltage- and chloride-dependent gate in the ClC-2 chloride channel. *J*  
856 *Physiol* **553**:873–9. doi:10.1113/jphysiol.2003.055988
- 857 Olsson MHM, Søndergaard CR, Rostkowski M, Jensen JH. 2011. PROPKA3: Consistent treatment  
858 of internal and surface residues in empirical pK<sub>a</sub> predictions. *J Chem Theory Comput.*  
859 doi:10.1021/ct100578z
- 860 Park E, Campbell EB, MacKinnon R. 2017. Structure of a CLC chloride ion channel by cryo-  
De Jesús-Pérez et al., 48 June 10, 2020

- 861 electron microscopy. *Nature* **541**:500–505. doi:10.1038/nature20812
- 862 Park E, MacKinnon R. 2018. Structure of the CLC-1 chloride channel from Homo sapiens. *Elife* **7**.  
863 doi:10.7554/eLife.36629
- 864 Parrinello M, Rahman A. 1981. Polymorphic transitions in single crystals: A new molecular  
865 dynamics method. *J Appl Phys* **52**:7182–7190. doi:10.1063/1.328693
- 866 Pusch M, Ludewig U, Rehfeldt A, Jentsch TJ. 1995. Gating of the voltage-dependent chloride  
867 channel ClC-0 by the permeant anion. *Nature*. doi:10.1038/373527a0
- 868 Rauh O, Hansen UP, Scheub DD, Thiel G, Schroeder I. 2018. Site-specific ion occupation in the  
869 selectivity filter causes voltage-dependent gating in a viral K<sup>+</sup> channel. *Sci Rep* **8**:1–15.  
870 doi:10.1038/s41598-018-28751-w
- 871 Rodríguez-Rangel S, Bravin AD, Ramos-Torres KM, Brugarolas P, Sánchez-Rodríguez JE. 2020.  
872 Structure-activity relationship studies of four novel 4-aminopyridine K<sup>+</sup> channel blockers.  
873 *Sci Rep*. doi:10.1038/s41598-019-56245-w
- 874 Roux B. 2008. The membrane potential and its representation by a constant electric field in  
875 computer simulations. *Biophys J*. doi:10.1529/biophysj.108.136499
- 876 Roy A, Kucukural A, Zhang Y. 2010. I-TASSER: A unified platform for automated protein structure  
877 and function prediction. *Nat Protoc* **5**:725–738. doi:10.1038/nprot.2010.5
- 878 Rychkov GY, Pusch M, Astill DS, Roberts ML, Jentsch TJ, Bretag AH. 1996. Concentration and pH  
879 dependence of skeletal muscle chloride channel ClC-1. *J Physiol* **497** ( Pt 2):423–435.

- 880 Rychkov GY, Pusch M, Roberts ML, Bretag AH. 2001. Interaction of hydrophobic anions with the  
881 rat skeletal muscle chloride channel ClC-1: Effects on permeation and gating. *J Physiol*  
882 **530**:379–393. doi:10.1111/j.1469-7793.2001.0379k.x
- 883 Rychkov GY, Pusch M, Roberts ML, Jentsch TJ, Bretag a H. 1998. Permeation and block of the  
884 skeletal muscle chloride channel, ClC-1, by foreign anions. *J Gen Physiol* **111**:653–65.  
885 doi:10.1085/jgp.111.5.653
- 886 Sali A, Blundell TL. 1993. Comparative protein modelling by satisfaction of spatial restraints. *J*  
887 *Mol Biol* **234**:779–815.
- 888 Sánchez-Rodríguez JE, De Santiago-Castillo JA, Arreola J. 2010. Permeant anions contribute to  
889 voltage dependence of ClC-2 chloride channel by interacting with the protopore gate. *J*  
890 *Physiol* **588**:2545–2556. doi:10.1113/jphysiol.2010.189175
- 891 Sánchez-Rodríguez JE, De Santiago-Castillo JA, Contreras-Vite JA, Nieto-Delgado PG, Castro-  
892 Chong A, Arreola J. 2012. Sequential interaction of chloride and proton ions with the fast  
893 gate steer the voltage-dependent gating in ClC-2 chloride channels. *J Physiol* **590**:4239–  
894 4253. doi:10.1113/jphysiol.2012.232660
- 895 Schewe M, Nematian-Ardestani E, Sun H, Musinszki M, Cordeiro S, Bucci G, De Groot BL, Tucker  
896 SJ, Rapedius M, Baukowitz T. 2016. A Non-canonical Voltage-Sensing Mechanism Controls  
897 Gating in K2P K+ Channels. *Cell* **164**:937–949. doi:10.1016/j.cell.2016.02.002
- 898 Shao XM, Feldman JL. 2007. Micro-agar salt bridge in patch-clamp electrode holder stabilizes  
899 electrode potentials. *J Neurosci Methods* **159**:108–115.

- 900           doi:10.1016/j.jneumeth.2006.07.001
- 901   Siefani E, Bezanilla F. 1998. Cut-open oocyte voltage-clamp technique. *Methods Enzymol.*
- 902           doi:10.1016/S0076-6879(98)93020-8
- 903   Thiemann A, Gründer S, Pusch M, Jentsch TJ. 1992. A chloride channel widely expressed in
- 904           epithelial and non-epithelial cells. *Nature*. doi:10.1038/356057a0
- 905   Traverso S, Zifarelli G, Aiello R, Pusch M. 2006a. Proton sensing of CLC-0 mutant E166D. *J Gen*
- 906           *Physiol* **127**:51–65. doi:10.1085/jgp.200509340
- 907   Traverso S, Zifarelli G, Aiello R, Pusch M. 2006b. Proton sensing of CLC-0 mutant E166D. *J Gen*
- 908           *Physiol* **127**:51–65. doi:10.1085/jgp.200509340
- 909
